# Supplementary material for: Using deep learning to annotate the protein universe
Source: Springer Nature journal article supplement (doi:10.1038/s41587-021-01179-w), 2022-02-21
Supplement: 41587_2021_1179_MOESM1_ESM.pdf [file 41587_2021_1179_MOESM1_ESM.pdf]

## Supplementary information

---

# Using deep learning to annotate the protein universe

---

In the format provided by the authors and unedited

1 Using Deep Learning to Annotate the Protein Universe

2 Maxwell L. Bileschi<sup>1, \*</sup>, David Belanger<sup>1</sup>, Drew H. Bryant<sup>1</sup>, Theo Sanderson<sup>1, 2</sup>,  
3 Brandon Carter<sup>3</sup>, D. Sculley<sup>1</sup>, Alex Bateman<sup>4</sup>, Mark A. DePristo<sup>1, 5</sup>, and Lucy J.  
4 Colwell<sup>1, 6, \*</sup>

5 <sup>1</sup>Google Research, Cambridge, MA, USA

6 <sup>2</sup>The Francis Crick Institute, London UK

7 <sup>3</sup>MIT Computer Science and Artificial Intelligence Laboratory, Cambridge, MA, USA

8 <sup>4</sup>European Molecular Biology Laboratory, European Bioinformatics Institute  
9 (EMBL-EBI), Hinxton, UK

10 <sup>5</sup>BigHat Biosciences, San Mateo, CA, USA

11 <sup>6</sup>Department. of Chemistry, University of Cambridge, Cambridge, UK

12 \*Correspondence to mlbileschi@google.com and lcolwell@google.com

# Supplementary Information

## 14 Pfam data

15 The positive results obtained using the Top Pick strategy with HMMER, i.e. in the absence  
16 of the rigorous statistical filters implemented in HMMER 3.1b2, likely reflect the fact that  
17 we are working with sequences that were originally classified by Pfam, and so passed the  
18 rigorous statistical thresholds for inclusion. Those sequences that did not pass these filters,  
19 and hence were not included in any Pfam family, may pose a more significant challenge to  
20 our implementation. For this reason we do not recommend that this HMM implementation  
21 is used in settings other than working with these benchmark datasets. For Pfam-full, we do  
22 not use the HMMs as a baseline because these models were used to label the data, so may  
23 achieve 100% accuracy by default. The Pfam-full dataset has 17772 families overall, and  
24 our test and dev sets contain sequences from 16755 families.

25 Pfam-seed sequences vary between 4 and 2037 amino acids in length, with 27045 seed  
26 sequences of length  $> 500$ . Fig. S1 contains histograms of Pfam-seed family sizes, the  
27 Pfam-seed sequence length distribution and also the frequency of amino acid usage in the  
28 Pfam-seed dataset. Family-specific gathering thresholds, shown in Fig. S1C, are used by  
29 HMMER 3.1b2 to determine whether a sequence belongs to each family [1]. The role  
30 of gathering thresholds is to increase coverage and decrease false positives. However our  
31 TPHMM setup simply takes the top match by score, regardless of the assigned gathering  
32 threshold. This raises the question of whether implementing the family-specific gathering  
33 thresholds would have improved the accuracy score achieved by TPHMM.

34 To address this, Fig. S1D shows the distribution of top scores for HMMER, for both  
35 correct and incorrect predictions. We note that the majority of incorrect predictions have  
36 scores *below* the assigned gathering thresholds. However, there also appear to be at least  
37 as many correct predictions below these values. This qualitative analysis is backed up by  
38 experimentation wherein we determined 8.5% of top picks were below their family-specific  
39 gathering thresholds from Pfam. As such, using the assigned gathering thresholds would  
40 not have helped performance, and effective use of gathering thresholds would have required  
41 us to re-tune each of these values for the training dataset used in this benchmark study.

42 Pfam allows a domain to belong to multiple families if these families are in the same  
43 clan [1]. Our top pick formulation of HMMER for sequence classification does not allow for  
44 multiple membership. However, within the seed sequences, there are only two sequences  
45 that belong to more than one family. The first sequence has the two distinct names  
46 ABEC3\_MOUSE/245-418 and E9QMH1\_MOUSE/234-407, and the second has the two  
47 distinct names NLP\_DROME/6-104 and B4HZJ8\_DROSE/6-104. Both of these sequences  
48 are found in our training dataset.

## 49 Definition of sequence identity

Because all sequences within a seed alignment are evolutionarily related it might be that training and test sequences in the random split are very close and thus trivial for the model to accurately classify. To address this, we stratify our analysis by the maximum percent identity of each test sequence with sequences in the train set. Inspired by the method of [2], we use the Pfam-seed family alignments to compute the similarity, measured as percent sequence identity, between every held-out test sequence and the training sequences within the same family. For each pair containing a single test and train sequence we do not realign, but instead use their length  $L$  alignment from the seed family multiple sequence alignment. Following [2], for two sequences of  $n_1$  and  $n_2$  residues, if the  $L$  aligned sequence position pairs consist in  $c_{\text{ident}}$  matches,  $c_{\text{ident}}$  mismatches and  $c_{\text{ident}}$  cases where either or both sequence contain a gap character such that  $L = c_{\text{ident}} + c_{\text{mismat}} + c_{\text{indel}}$ , then the pairwise sequence identity is defined as:

$$\text{pid} = \frac{c_{\text{ident}}}{\text{MIN}(n_1, n_2)}.$$

50 For Pfam-seed we use the seed family alignment to compute a pairwise distance between  
51 every held-out test sequence and sequences from the same family that are contained in  
52 the training set. Another metric of distance between each held-out test sequence and the  
53 training set is provided by the percent sequence identity measured by BLASTp. To provide  
54 an idea of the differences between these metrics, Fig. S1E compares them across all 126171  
55 sequences contained in the randomly split Pfam-seed held-out test set.

## 56 Details of Neural Network Architectures

57 In a residual network (ResNet) [3], the layers are built up additively, with  $f_i = f_{i-1} + g_i(f_{i-1})$ .  
58 Here, each  $f_i$  is an  $L \times F$  array and  $g_i(\cdot)$  is an additional one-layer convolutional network  
59 (along with a kernel-size-one bottleneck convolution; see Figure ??) with trained weights  
60 specific to that layer. In our model,  $f_0$  is obtained by a convolutional layer with  $F$  channels  
61 applied to the output of the input network, with no bottleneck convolution applied before  
62 the residual blocks. Each ResNet layer maintains a  $L \times F$  representation; no downsampling  
63 is performed until the final pooling step. We also note that a convolutional layer is used  
64 before any residual block, so as to convert the per-residue representation into the correct  
65 shape before consumption by the residual blocks. For residues outside the set of the 20  
66 natural amino acids, we use a column of zeros for this initial input to the residual blocks.

67 We use a convolutional neural network (CNN) to construct this  $L \times F$  array, since  
68 they are fast to train and evaluate on modern hardware, an advantage that is even more  
69 pronounced when evaluating large sets of sequences in parallel. Convolutional architectures  
70 are also easily composed into higher-order interactions. The  $L \times F$  array is then pooled  
71 along the length of the sequence, ensuring invariance to padding. Hyperparameters tuned  
72 for each neural network include the choice of  $F$  and max vs mean pooling in addition to  
73 network depth, which was varied between 1 and 6 layers (plus the initial convolution).

## 74 Dilated Convolutions

75 Dilated convolutions are a popular method for enabling CNNs to capture long range  
76 interactions across the inputs [4]. One way to model these long-range interactions  
77 would be to use convolutions with very wide kernels. However, doing so increases the  
78 computational complexity of prediction and introduces a considerable number of parameters  
79 to train. Instead, dilated convolutions use convolution kernels with holes in them, so that  
80 the complexity and number of parameters is the same as small, local convolutions, but the  
81 overall receptive field of the convolution is wide.

Consider a convolution with kernel width 5, and let  $f_{i,j}$  be the representation in layer  $i$  of the CNN at position  $j$  in the sequence. In a traditional 1-dimensional convolution,  $f_i$  is a linear function of

$$\{f_{(j-2)}, f_{(i-1),(j-1)}, f_{(i-1),j}, f_{(i-1),(j+1)}, f_{(i-1),(j+2)}\}.$$

In a dilated convolution with dilation rate  $r$ , it is a function of

$$\{f_{(i-1),(j-2r)}, f_{(i-1),(j-r)}, f_{(i-1),j}, f_{(i-1),(j+r)}, f_{(i-1),(j+2r)}\}.$$

82 At each layer of our CNN,  $r$  is increased by a factor of  $k$ , so the overall receptive field size  
83 of the CNN is exponential in its depth. Specifically, if the model has  $n_1$  non-dilated layers  
84 followed by  $n_2$  dilated layers,  $k$  is the kernel width and  $r$  the dilation rate, then the receptive  
85 field size is  $k + 2(k - 1)(n_1 - 1) + 2(k - 1) \sum_{i=1}^{n_2} r^i$ . These terms correspond to the first  
86 layer, the remaining non-dilated layers, and the dilated layers respectively.

## 87 Model Invariance to Padding

88 At both train and test time, our model processes sequences in batches. The batches are  
89 of variable length, so input one-hot sequences are padded with zeros before being stacked  
90 together in a tensor that can be processed in parallel on a GPU (see Fig. ??C). It is  
91 imperative that our model’s predictions are insensitive to the padding, as the amount of  
92 padding depends on the other sequences in the batch (we pad to the longest sequence in  
93 the batch). For CNNs, our model maintains an  $L \times F$  array of features at every layer,  
94 where each column corresponds to a specific location in the input sequence. Before each  
95 convolution or batch normalization operation, we zero-out the features in any location that  
96 corresponds to padding in the input sequence. This ensures that the model’s predictions are  
97 insensitive to padding at test time. However, the dynamics of training our CNNs are still  
98 effected by padding, since batch normalization computes feature averages across the length  
99 of the sequence, and these lengths vary due to padding.

## 100 Model Training

101 We use the Adam optimizer [5]. The learning rate is subject to exponential decay following a  
102 warm-up period, and the length of the period was not treated as a tunable hyperparameter.

103 At train time, we present the model with randomly-drawn batches. Consistent with popular  
104 experience [6], we find that it is useful to clip gradients, and adaptive gradient clipping  
105 worked significantly better than static gradient clipping [7], so we use adaptive gradient  
106 clipping for all deep models.

## 107 **Neural Network Hyperparameters**

108 Our embedding network architecture involves a variety of hyperparameters as outlined in  
109 Tables S13 and S14. The “dev” fold of the data is used to identify the optimal hyperparameter  
110 settings, while model performance statistics are reported using the completely distinct “test”  
111 fold. The CNN hyperparameters are tuned using values sampled at random from each  
112 hyperparameter search range, reported in Table S13. The number of searched values is  
113 reported in Table S15. We carried out an initial study that identified the most promising  
114 architecture. As shown in Table S13 we allowed the batch size to vary, and introduced  
115 additional learning rate decay parameters in this study. Moreover, the number of filters  
116 was greatly increased, and the number of layers was allowed to vary as a hyperparameter.  
117 These modifications helped to maximize the performance of ProtCNN in terms of accuracy.  
118 However, they made the resulting model more difficult to interpret, in the sense that it  
119 became difficult to attribute increases in performance to specific parameters such as the  
120 size of the receptive field. Table S16 shows the ProtCNN hyperparameters used for the  
121 Pfam-full dataset.

## 122 **Model Performance**

123 Neural network training is subject to sources of stochasticity such as variable initializations,  
124 example ordering, and floating point computations on GPUs. The accuracy of multiple  
125 ensemble elements (replicates) with identical hyperparameter configurations is shown in  
126 Fig. S2A, and is very stable. As reported in the main text, which specific sequences get  
127 misclassified is less stable, leading to the performance improvements reported by the ensemble  
128 ProtENN. Fig. S2B shows the rapid increase in accuracy at sequence classification for the  
129 Pfam-seed dataset as a function of the number of ProtENN elements. Moreover, changing  
130 model hyperparameters did not have a large effect on the accuracy achieved, for example  
131 Fig. S2C reports performance as a function of the receptive field size.

## 132 **Benchmark Performance on Random Split**

133 Figure S3A shows the performance of ProtCNN, ProtENN and the baseline methods at Pfam  
134 family prediction as a function of the maximum similarity of each held-out test sequence  
135 with sequences in the training set, for those test sequences in the random split that are  
136 most distant from the training data. We find that ProtENN makes significantly fewer errors  
137 than all other methods in all bins shown in this figure ( $p < 0.05$ , McNemar test). Tables S2

138 and S3 show the number of sequences per bin for both Figure ?? in the main text, and  
139 Figure S3A. In Figure S3B we note that both ProtCNN and ProtENN excel at accurately  
140 classifying short Pfam domain sequences.

141 Overall those ProtCNN models that perform best tend to have the largest memory  
142 footprints, to some extent irrespective of how that memory footprint is achieved. Increasing  
143 the number of model parameters via the number of filters, the kernel size and/or the number  
144 of ResNet blocks, and increasing the training batch size can all lead to improved accuracy.  
145 The memory footprint of the models is limited by the amount of memory available on a single  
146 GPU, necessitating trade-offs among these factors. Additional computational resources can  
147 overcome this memory limitation: we didn't explore TPUs [8], multiple GPUs or CPUs, all  
148 of which could result in better models, suggesting room for future improvements on this  
149 task.

## 150 **Benchmark Performance on Clustered Split**

151 For the results presented in this paper, we use the clustered dev data to tune the number  
152 of training iterations and the number of ensemble elements, while making no changes to  
153 the model hyperparameters from those identified using the random split. When considering  
154 aggregate accuracy metrics it is important to consider the test distribution under which  
155 this metric is computed. The randomly-split test data has a natural distribution over  
156 families defined by the distribution over families in Pfam. However, in the clustered data  
157 the distribution over families is a complex consequence of the clustering process. In Fig. S4,  
158 we find that many families are represented very differently in the random and clustered  
159 Pfam seed data sets.

160 For both the random and clustered split, we stratify model performance by percent  
161 sequence identity with the training data, which serves to avoid overestimating the gener-  
162 alization capabilities of the model. For the clustered split, all held-out test sequences are  
163 guaranteed to be far from the train set. The community has embraced the second evaluation  
164 approach, but we suggest that the former is at least as important. If future users of such a  
165 machine learning system will issue prediction requests for sequences that are drawn from  
166 a distribution similar to the existing data, the random split helps us evaluate how useful  
167 the system will be to these researchers. Furthermore, performing a stratified analysis of  
168 the randomly-split data reveals how performance varies with sequence identity without  
169 introducing systematic skew in the training data due to clustering. On the other hand, if  
170 users will mostly issue queries for very remote sequences, then evaluating models in terms  
171 of the clustered split is important.

## 172 **Evaluation on Clustered Split using Per-Cluster Averaging**

173 Overall, our approach follows that of [9] with four main modifications. The first is that  
174 we place multiple clusters in  $set_1$ , rather than just the largest. This avoids putting very

175 few examples in the training set for families where the clustering produces a large number  
176 of small clusters, while maintaining the property that the train, dev, and test sets are  
177 well-separated. Second, our formulation uses some of the non-train sequences for a dev  
178 set to make sure that the number of training steps and ensemble elements are not chosen  
179 using the held-out test data. Third, if a family cannot be split at sequence identity  $\alpha$ , we  
180 place the entire family in the training set. This differs from [9], which completely discards  
181 families that can not be split. When clustering non-train data to split into dev and test,  
182 we similarly place the entire family in the dev set if it can not be split. The fourth is that  
183 when we re-cluster the non-training data to produce dev and test sets, instead of selecting  
184 single sequences from each cluster, we include all elements of each cluster. We find that  
185 though the fourth decision simplifies our setup, following more closely [9] yields qualitatively  
186 similar results (Table S6). Finally we note that while our clustering protocol follows that  
187 of [9], we evaluate models in terms of a different prediction task. We consider multi-class  
188 classification, whereas [9] considers a set of per-family binary detection problems.

## 189 Sequence Annotation for Pfam-full

190 The 17929 profile HMMs built from the  $\sim 1.34$  million curated sequences of Pfam-seed are  
191 used to annotate the  $\sim 54$  million sequences in Pfam-full. Like nearest-neighbour methods  
192 such as BLASTp, the predictive accuracy of deep learning models typically improves as the  
193 amount of well-labelled training data increases. To compare these approaches on a larger  
194 dataset, we randomly split each Pfam-full family, assigning 80% of sequences to the train  
195 set and 10% each to dev and test sets, and carry out a hyperparameter search to optimize  
196 ProtCNN accuracy for this new task. Note that 16755 families have sequences in the dev  
197 and test sets for the Pfam-full data. To provide a highly accurate baseline we impute labels  
198 via the top BLASTp hit, using the training set as the query database. We do not include  
199 profile HMM-based methods (Top Pick HMM and phmmer), because the ground truth data  
200 in Pfam full was generated using HMMs.

201 Our resulting ProtCNN model has an error rate of just 1.26% ( $\sim 69$ k errors), lower than  
202 the BLASTp error rate of 1.78% ( $\sim 97$ k errors). ProtENN, ensembled across 13 ProtCNN  
203 models, reduces the error even further to just 0.5% ( $\sim 25$ k errors). It is important to stratify  
204 our analysis by the similarity of each test sequence to the closest sequence in the training set,  
205 to account for sequence similarity between the train and test data. For the Pfam-full data  
206 use BLASTp to calculate a measure of sequence identity. We use the Pfam-full training set  
207 as the query database for BLASTp and report the percent sequence identity of the highest  
208 scoring pair found by BLASTp for each held-out test sequence. This method measures  
209 similarity across all Pfam families, in contrast to the method used for Pfam-seed, which  
210 computes the distance between the train and test sets within each Pfam family. Fig. S1E  
211 compares these two metrics across the 126171 held-out sequences of the randomly split  
212 Pfam-seed data.

213 Fig. S7 shows that ProtENN is highly accurate across all bins of held-out test sequences



214 distance from the training data. To analyze the performance for those held-out test  
215 sequences that are most distant from the training set, Fig. S7B divides the 90210 held-out  
216 test sequences that are most distant from the training sequences into 10 bins, and analyzes  
217 model performance for each bin. Tables S10 and S11 provide the number of sequences  
218 in each bin of Figs. S7A and B. We find that ProtENN is significantly more accurate for  
219 sequences with identity  $>32\%$  to the training set.

220 For the split of Pfam-full, we observe an increase in model error rate for BLASTp in the  
221 last decile of pairwise sequence identity computed using BLASTp (see Fig. S7A). There are  
222 two potential sources for this reduction in accuracy. The first is sequences that are closer in  
223 terms of sequence identity to a member of a different family than to their own. The second is  
224 that some sequences in the dataset are sub-sequences of others. Where the sub-sequence is in  
225 the test set, BLASTp measures “100%” sequence identity with the super-sequence contained  
226 in the training set. Discerning the correct classification in these cases can be quite difficult.  
227 For example, in Pfam-full, one of the test sequences is A0A010NMM2\_9MICC/241-409,  
228 and one of the training sequences is A0A010NMM2\_9MICC/4-495. In this case, the former  
229 sequence has is identical to part of the latter, but it is classified differently by Pfam: the test  
230 sequence is the NAD binding domain of AdoHcyase, while the latter is the full AdoHcyase  
231 domain. This may explain some of the difficulty that BLASTp has with sequences that are  
232 very similar to those in the training set.

### 233 **Effect of family size on performance**

234 An additional potential performance confounder is family size. To address this issue, we  
235 split the held-out test sequence data for the Pfam-seed random and clustered splits and also  
236 for the Pfam-full random split by total family size into ten bins. Fig. S5 shows the model  
237 error rate for held-out sequences from each data split. These results show that ProtENN  
238 performs well across all family size bins.

### 239 **Combining ProtENN and Top pick HMM**

240 The main text describes how we built a model that combines ProtENN and Top pick HMM  
241 predictions, to yield a model that reduces the error rate on the clustered split dataset  
242 by 35%. Fig. S10A shows the accuracy of the ProtENN and Top pick HMM models for  
243 the held-out test sequences of the clustered split as a function of the HMMER e-value for  
244 each sequence. We note that the Top pick HMM accuracy is very high for sequences with  
245 predictions that have HMMER e-value  $< 10^{-4}$ . However, for this challenging data split,  
246 many sequences have HMMER e-values  $> 10^{-2}$ , which is a regime in which on average,  
247 the ProtENN predictions are more accurate than those made by the Top pick HMM. To  
248 take advantage of this observation, for each held-out test sequence we use the reported  
249 HMMER e-value to decide whether to trust the Top pick HMM or ProtENN prediction.  
250 Fig. S10B shows how the overall accuracy of this combined model varies as a function of the

251 specific HMMER e-value chosen as the threshold that determines which model prediction is  
252 reported.

253 An alternative measure of model confidence is provided by the ProtENN ensemble  
254 consensus for each held-out test sequence. Fig. S11A shows the distribution of ProtENN  
255 ensemble consensus scores for the held-out test sequences from the clustered split dataset,  
256 note that while many predictions have an ensemble consensus of 100%, there are also a  
257 number of sequences that have lower ProtENN prediction ensemble consensus. In Fig. S11B  
258 we stratify the accuracy of Top pick HMM and ProtENN predictions as a function of the  
259 ProtENN ensemble consensus, for held-out test sequences from the clustered split of Pfam  
260 seed. Note that for sequences with ProtENN ensemble consensus  $> 30\%$  the ProtENN  
261 predictions are, on average, more accurate than those made by the Top pick HMM, while  
262 for lower ensemble consensus scores, the reverse is true. As shown in Fig. S11C, this results  
263 in a model combination whose accuracy peaks when a threshold of around 30% ensemble  
264 consensus is used to determine whether the HMM top pick or ProtENN consensus should  
265 be reported.

266 Finally, in Fig. S12A we report HMM top pick and BLASTp accuracy for held-out  
267 test sequences from the clustered split as a function of the HMMER e-value for each test  
268 sequence prediction. Note that for nearly all e-values, the HMM top pick predictions are  
269 more accurate. As a result, Fig. S12B shows that the model that results from combining  
270 these two approaches does not exceed the accuracy of Top pick HMM no matter what  
271 e-value threshold is used to determine whether the BLASTp or HMM top pick predictions  
272 are trusted.

## 273 Computational Performance

274 Protein sequence databases like UniProt contain hundreds of millions of sequences and are  
275 growing exponentially [10, 11]. This places a premium on the computational performance  
276 of protein sequence analysis tools, motivating efforts dedicated to optimization over the  
277 last decades [9, 12–16]. It is therefore critical to evaluate the computational cost of the  
278 deep models to ensure that they aren't prohibitively expensive. Evaluating the runtime  
279 performance of software is delicate. To ensure reproducibility, we use sandboxed instances on  
280 Google Cloud Platform: a n1-standard-32 (32-core / 120 GB RAM) instance for CPU-only  
281 and a n1-standard-8 (8-core 32GB RAM) + NVIDIA P100 GPU instance for GPU testing.  
282 A full set of commands to reproduce our analysis is provided at the end of the supplement.  
283 The basic numerical operations required for ProtCNN can be parallelized both along the  
284 length of the sequence and across multiple sequences, and can be accelerated by hardware.

285 Table S17 shows the computational performance of ProtCNN, HMMER<sup>1</sup>, and BLAST on  
286 our benchmark. ProtCNN on a single CPU processes 9.7 seqs/sec, substantially faster than  
287 BLASTp (1.2 seqs/sec) and `hmmsearch` (2.2 seqs/sec) but 2.5x slower than `hmmsearch` (24.4

---

<sup>1</sup>We benchmark two methods of comparing HMMs to sequences, `hmmsearch` and `hmmsearch`, which are both provided by the software package HMMER.

288 seqs/sec). Using the P100 GPU accelerates the inference speed of ProtCNN by a factor of  
289 38, achieving 376.6 seqs/sec. Since both `hmmsearch` and BLASTp run efficiently in parallel,  
290 equivalent throughput would require  $\sim 15$  CPU cores for `hmmsearch` and  $\sim 342$  cores for  
291 BLASTp. Our most accurate model (ProtENN) involves an ensemble of 19 distinct ProtCNN  
292 models, implying a throughput of  $\sim 20$  sequences per second when using a GPU, though  
293 distillation [17] would presumably significantly improve this throughput. This demonstrates  
294 that the deep learning models presented here can be used with reasonable turn-around times  
295 using standard computational resources.

296 Table S17 reports the number of sequences processed per core-second, computed using  
297 the runtime to process 10% of the seed test fasta sequences. We limited each program to a  
298 single CPU core to focus on computational efficiency rather than the effectiveness of shared  
299 memory parallelization. To minimize the cost of input/output (IO), all data files were held  
300 in RAM. We ran inference for ProtCNN both with and without a GPU accelerator. The  
301 GPU configuration represents a common inference environment for deep learning models,  
302 while the CPU-only configuration allows direct comparison with BLASTp and HMMER.  
303 We made a good faith effort to build and run all programs efficiently in this environment;  
304 additional details, including command lines for benchmarking, are available below. Note  
305 that GPU-accelerated versions of BLASTp [18] and HMMER [19] were not evaluated and  
306 may have significantly higher throughput than the CPU-only versions considered here.

307 Benchmarking for baselines was performed run on a Google Cloud Platform (GCP)  
308 n1-standard-32 instance with 32 Intel Broadwell cores, 120G RAM, and solid-state disk  
309 drive running Ubuntu Linux 16.04. `blast` and HMMER versions were 2.2.31+ and 3.2.1,  
310 respectively (note that this is the most recent release of HMMER and `blast` and they are  
311 different to the version benchmarked for accuracy). ProtCNN runtimes on CPU and GPUs  
312 were run on a n1-standard-8 (8 cores, 32 Gb, SSD) Google Cloud Platform instance with an  
313 attached NVIDIA P100 GPU:

```
314 gcloud beta compute --project "${PROJECT}" instances create \  
315 "${GPU_INSTANCE}" --zone "us-west1-b" \  
316 --machine-type "n1-standard-8" \  
317 --image=ubuntu-1604-lts-drawfork-v20190424 \  
318 --image-project=eip-images --boot-disk-size "250" \  
319 --boot-disk-type "pd-ssd" --accelerator type="nvidia-tesla-p100,count=1" \  
320 --maintenance-policy TERMINATE --min-cpu-platform "Intel Skylake"
```

321 In order to minimize the overhead of input and output (IO), a common bottleneck for  
322 `blast` and HMMER, all data files were stored directly in RAM in `/dev/shm` in order to  
323 eliminate, as much as possible, IO overhead. Even our largest set of sequences (54M full  
324 train) is only 9.2Gb uncompressed, less than 10% of the RAM available on the nt-standard-32  
325 and  $\sim 30\%$  of the RAM of the nt-standard-8 instance. Both `hmmsearch` and `hmmsearch` were  
326 allowed two cores (`--cpu 1` argument) as recommended for its master/worker software

327 architecture. `blast` was run with a single core (`--num_threads 1`). ProtCNN inference was  
328 run using a custom python script that (a) read in FASTA records and (b) ran inference of  
329 the ProtCNN as a TensorFlow SavedModel with command line flags to limit access to a  
330 single CPU core and/or the GPU.

331 All timings were run in three replicates and the user time averaged over replicates. A  
332 completely independent second machine was used by another user, producing similar runtime  
333 estimates (data not shown). The runtime of `blastp` against the full train sequences database  
334 was run with 32 cores, as the `blastp` built-in parallelism exhibits near linear scaling with  
335 cores and, even with 32 cores end-to-end runtime is 6 hrs in our timing test. Overall, there  
336 were 126,171 sequences in seed test sequences, which we downsampled to a 10% fraction  
337 of 12,617 sequences for runtime estimates. The seed train set has 1,086,741 sequences, full  
338 test has 5,445,307, and full train has 43,641,836 sequences. Note that `hmmsearch` runs 11x  
339 faster than `hmmsearch` for our task, so we discuss the performance of `hmmsearch` in the main  
340 text but the runtimes for both programs are provided for completeness.

341 The complete list of unix command lines needed to reproduce these times are provided  
342 below:

```
343 # Create the machine [On the GCP instance, run once]
344 PROJECT=YOUR_GCP_PROJECT
345 ZONE=YOUR_GCP_ZONE
346
347 gcloud beta compute --project "${PROJECT}" instances create \
348 "blast-hmmer-timing" --zone "${ZONE}" --machine-type "n1-standard-32" \
349 --image=ubuntu-1604-lts-drawfork-v20190424 --image-project=eip-images \
350 --boot-disk-size "250" --boot-disk-type "pd-ssd"
351
352 gcloud beta compute ssh blast-hmmer-timing
353
354 # make a location in memory so we can run everything in the machine's memory.
355 TIMING_DIR=/dev/shm/timing
356 sudo mkdir ${TIMING_DIR}
357 sudo chown ${USER} ${TIMING_DIR}
358
359 # install required software
360 sudo apt-get --yes install make gcc
361
362 # Install blast
363 sudo apt-get --yes install ncbi-blast+
364
365 # install hmmer version 3.2.1
366 cd ~
```

```

366 wget http://eddylab.org/software/hmmer/hmmer-3.2.1.tar.gz
367 tar xzf hmmer-3.2.1.tar.gz
368 pushd hmmer-3.2.1
369 ./configure --enable-threads
370 make
371 make check
372 popd
373 HMMSEARCH=~ /hmmer-3.2.1/src/hmmsearch
374 HMMSCAN=~ /hmmer-3.2.1/src/hmmscan
375 HMMPRESS=~ /hmmer-3.2.1/src/hmmpress
376
377 # Get the Pfam 32.0 hmm profiles.
378 cd ${TIMING_DIR}
379 wget ftp://ftp.ebi.ac.uk/pub/databases/Pfam/releases/Pfam32.0/Pfam-A.hmm.gz
380 gunzip Pfam-A.hmm
381
382 # Create the compressed hmm db for hmmscan
383 ${HMMPRESS} Pfam-A.hmm
384
385 PROTEINS_BUCKET=gs://brain-genomics-public/research/proteins/timing
386
387 # Grab seed_train.fasta, full_train.fasta and seed_test.fasta
388 for f in full_train.fasta seed_train.fasta seed_test.fasta; do
389     echo "Downloading file $f"
390     curl -o ${TIMING_DIR}/${f} \
391         https://storage.googleapis.com/brain-genomics-public/research/proteins/timing/${f};
392 done
393
394
395 wc -l *.fasta
396 # Expect to see 252342 lines for seed_test.fasta,
397 # 2173482 for seed_train.fasta
398 # and 87283672 for full_train.fasta.
399
400 # Create a 10% subset of the seed_test.fasta
401 head -n 25234 seed_test.fasta > seed_test.10_percent.fasta
402
403 # Create blast databases for seed and full train
404 makeblastdb -in seed_train.fasta -dbtype prot
405 makeblastdb -in full_train.fasta -dbtype prot
406

```

```

407
408 # Use the 10% sample of seed_test so the programs finish in a shorter timespan.
409 timing_fasta=seed_test.10_percent.fasta
410
411 # Use the full seed_test.fasta for a more complete runtime estimate.
412 # timing_fasta=seed_test.fasta
413
414 # We are using three replicates.
415 N_REPLICATES=3
416 HMMER_NCORES=1
417
418 # Time hmmscan and hmmsearch of seed_test.fasta against Pfam-A.hmm.
419 for replicate in $(seq $N_REPLICATES); do
420 for binary in ${HMMSCAN} ${HMMSEARCH}; do
421     echo "Profiling hmmer ${binary} [replicate ${replicate}]"
422     name="hmmer.${timing_fasta}.${binary##*/}.cores_${HMMER_NCORES}.rep_${replicate}"
423     (time ${binary} \
424         --cpu ${HMMER_NCORES} \
425         --tblout ${name}.txt \
426         -o ${name}.log \
427         Pfam-A.hmm ${timing_fasta}) &> ${name}.time.log
428     cat ${name}.time.log
429 done
430 done
431
432 # We want to use a different number of cores for each blast calculation.
433 # For seed, we want to use a single core so it's more directly comparable
434 # to hmmer. But blastp running on the 10% subset against the full
435 # training database takes a really long time. So we'll use all cores for that.
436 declare -A blast_database_ncores
437 blast_database_ncores[seed_train.fasta]=1
438 blast_database_ncores[full_train.fasta]=32
439
440 # Time blast against seed_train
441 for replicate in $(seq $N_REPLICATES); do
442 for blast_database in seed_train.fasta full_train.fasta; do
443     ncores=${blast_database_ncores[${blast_database}]}
444     echo "Profiling blastp against database \
445     ${blast_database} with ${ncores} cores [replicate ${replicate}]"
446     name="blast.${timing_fasta}.${blast_database}.cores_${ncores}.rep_${replicate}"
447     (time blastp \

```

```

448     -query ${timing_fasta} \
449     -db ${blast_database} \
450     -outfmt 10 -max_hsps 1 -num_alignments 1 \
451     -num_threads ${ncores} \
452     -out ${name}.out ) &> ${name}.time.log
453     cat ${name}.time.log
454 done
455 done
456
457 # grep out all of the results:
458 fgrep real *.time.log
459

```

## 460 References

- 461 [1] Robert D Finn, Alex Bateman, Jody Clements, Penelope Coggill, Ruth Y Eberhardt,  
462 Sean R Eddy, Andreas Heger, Kirstie Hetherington, Liisa Holm, Jaina Mistry, et al.  
463 Pfam: the protein families database. *Nucleic acids research*, 42(D1):D222–D230, 2013.
- 464 [2] Sean Eddy and Nick Carter. easel/esl-distance, 2017. URL [https://github.com/  
465 EddyRivasLab/easel/blob/master/esl\\_distance.tex](https://github.com/EddyRivasLab/easel/blob/master/esl_distance.tex).
- 466 [3] Kaiming He, Xiangyu Zhang, Shaoqing Ren, and Jian Sun. Deep residual learning  
467 for image recognition. In *Proceedings of the IEEE conference on computer vision and  
468 pattern recognition*, pages 770–778, 2016.
- 469 [4] Fisher Yu and Vladlen Koltun. Multi-scale context aggregation by dilated convolutions.  
470 *arXiv preprint arXiv:1511.07122*, 2015.
- 471 [5] Diederik P Kingma and Jimmy Ba. Adam: A method for stochastic optimization.  
472 *International Conference on Learning Representations*, 2014.
- 473 [6] Razvan Pascanu, Tomas Mikolov, and Yoshua Bengio. On the difficulty of training  
474 recurrent neural networks. In *International Conference on Machine Learning*, pages  
475 1310–1318, 2013.
- 476 [7] Jan Chorowski, Dzmitry Bahdanau, Kyunghyun Cho, and Yoshua Bengio. End-to-end  
477 continuous speech recognition using attention-based recurrent nn: first results. *arXiv  
478 preprint arXiv:1412.1602*, 2014.
- 479 [8] Norman P Jouppi, Cliff Young, Nishant Patil, David Patterson, Gaurav Agrawal,  
480 Raminder Bajwa, Sarah Bates, Suresh Bhatia, Nan Boden, Al Borchers, et al. In-  
481 datacenter performance analysis of a tensor processing unit. In *2017 ACM/IEEE 44th*

- 482 *Annual International Symposium on Computer Architecture (ISCA)*, pages 1–12. IEEE,  
483 2017.
- 484 [9] Sean R Eddy. Accelerated profile hmm searches. *PLoS computational biology*, 7(10):  
485 e1002195, 2011.
- 486 [10] UniProt Consortium. Uniprot: the universal protein knowledgebase. *Nucleic acids*  
487 *research*, 45(D1):D158–D169, 2016.
- 488 [11] Sara El-Gebali, Jaina Mistry, Alex Bateman, Sean R Eddy, Aurélien Luciani, Simon C  
489 Potter, Matloob Qureshi, Lorna J Richardson, Gustavo A Salazar, Alfredo Smart, et al.  
490 The pfam protein families database in 2019. *Nucleic acids research*, 47(D1):D427–D432,  
491 2018.
- 492 [12] Stephen F Altschul, Warren Gish, Webb Miller, Eugene W Myers, and David J Lipman.  
493 Basic local alignment search tool. *Journal of molecular biology*, 215(3):403–410, 1990.
- 494 [13] Stephen F Altschul, Thomas L Madden, Alejandro A Schäffer, Jinghui Zhang, Zheng  
495 Zhang, Webb Miller, and David J Lipman. Gapped blast and psi-blast: a new generation  
496 of protein database search programs. *Nucleic acids research*, 25(17):3389–3402, 1997.
- 497 [14] Yongan Zhao, Haixu Tang, and Yuzhen Ye. Rapsearch2: a fast and memory-efficient  
498 protein similarity search tool for next-generation sequencing data. *Bioinformatics*, 28  
499 (1):125–126, 2011.
- 500 [15] Noah M Daniels, Andrew Gallant, Jian Peng, Lenore J Cowen, Michael Baym, and  
501 Bonnie Berger. Compressive genomics for protein databases. *Bioinformatics*, 29(13):  
502 i283–i290, 2013.
- 503 [16] Benjamin Buchfink, Chao Xie, and Daniel H Huson. Fast and sensitive protein alignment  
504 using diamond. *Nature methods*, 12(1):59, 2015.
- 505 [17] Geoffrey Hinton, Oriol Vinyals, and Jeff Dean. Distilling the knowledge in a neural  
506 network. *arXiv preprint arXiv:1503.02531*, 2015.
- 507 [18] Panagiotis D Vouzis and Nikolaos V Sahinidis. Gpu-blast: using graphics processors to  
508 accelerate protein sequence alignment. *Bioinformatics*, 27(2):182–188, 2010.
- 509 [19] Samuel Ferraz and Nahri Moreano. Evaluating optimization strategies for hmmer  
510 acceleration on gpu. In *2013 International Conference on Parallel and Distributed*  
511 *Systems*, pages 59–68. IEEE, 2013.
- 512 [20] Andrew Campen, Ryan M Williams, Celeste J Brown, Jingwei Meng, Vladimir N  
513 Uversky, and A Keith Dunker. Top-idp-scale: a new amino acid scale measuring  
514 propensity for intrinsic disorder. *Protein and peptide letters*, 15(9):956–963, 2008.



515 [21] S El-Gebali, L Richardson, and R Finn. Repeats in pfam, 2018. URL [https://doi.](https://doi.org/10.6019/TOL.Pfam_repeats-t.2018.00001.1)  
516 [org/10.6019/TOL.Pfam\\_repeats-t.2018.00001.1.](https://doi.org/10.6019/TOL.Pfam_repeats-t.2018.00001.1)

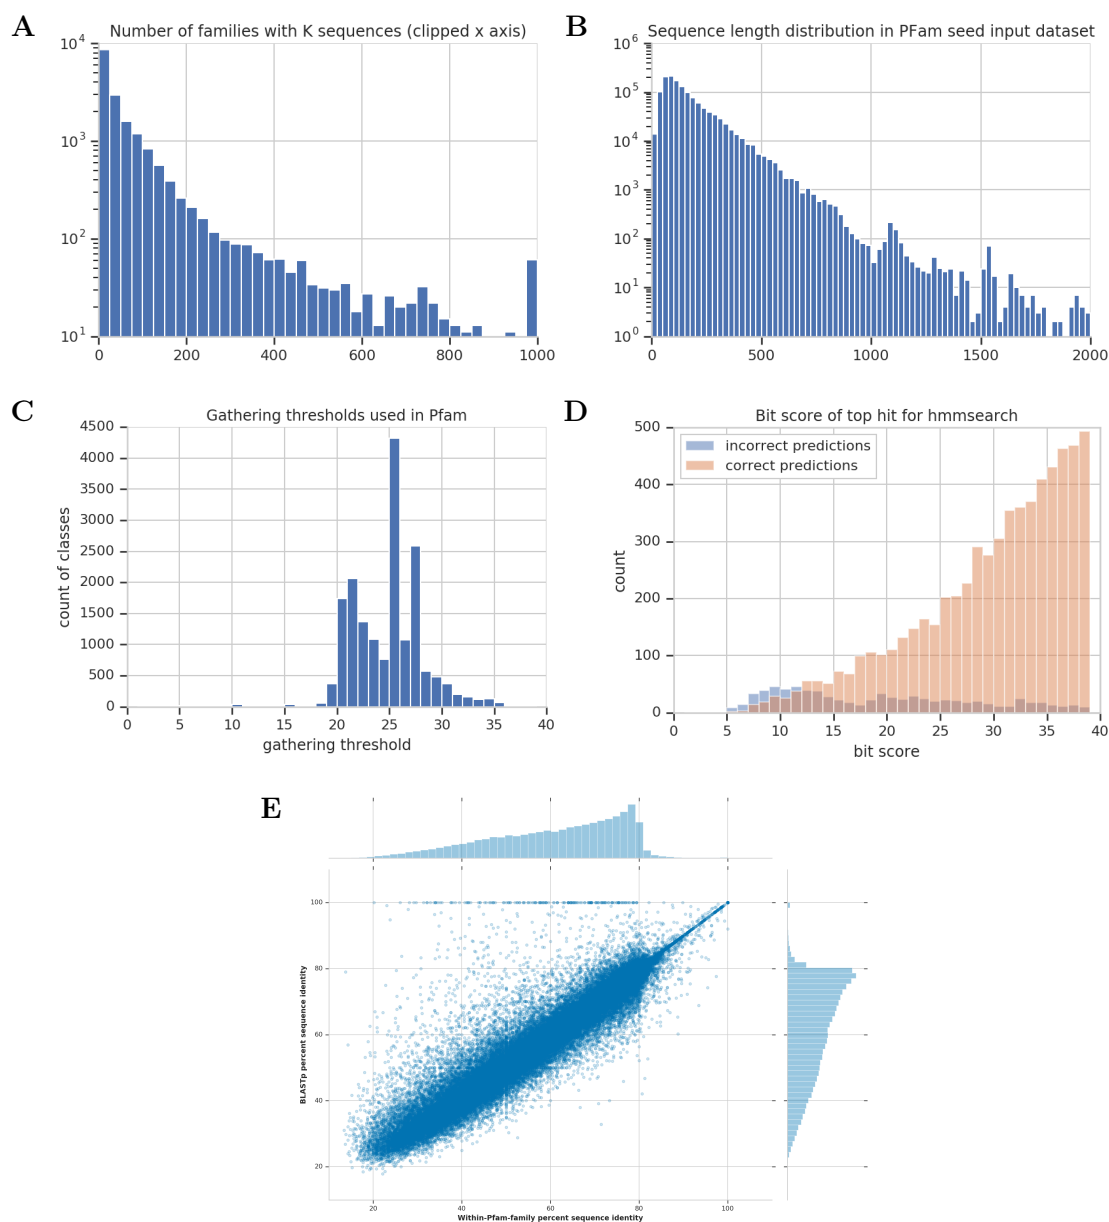

Figure S1: Benchmark Pfam-seed dataset statistics calculated across the entire Pfam-seed dataset. (A) Number of sequences per family. Values larger than 1000 are clipped to the last histogram bucket. (B) Sequence length distribution of unaligned sequences. Pfam-seed sequences vary between 4 and 2037 amino acids in length, with 27045 seed sequences of length  $> 500$ . (C) Histogram of gathering thresholds used in Pfam 32.0. (D) Scores achieved by the top hits for the Top pick HMM model, x axis is truncated. (E) Comparison of the within Pfam family distance calculated using the formula given above with the BLASTp percent sequence identity for each of the 126171 held-out test sequences of the Pfam-seed dataset.

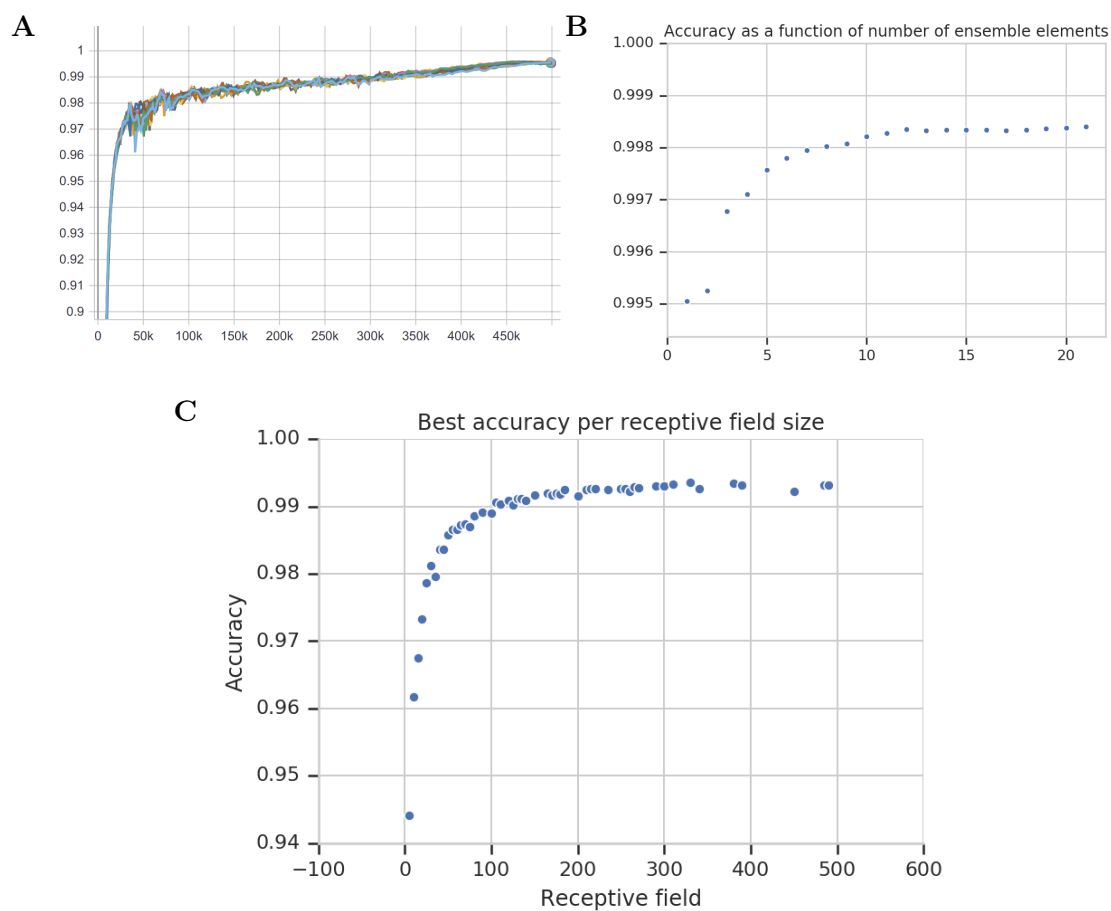

Figure S2: (A) Accuracy of training many replicates as ensemble elements on the Pfam-seed training dataset. A value at 100K on the x-axis indicates model accuracy on the test set after seeing 100,000 training minibatches. (B) Predictive accuracy on the held out Pfam-seed test data as a function of the number of ensemble elements. (C) Larger receptive fields generally produce more accurate networks. A hyperparameter sweep, producing different receptive field sizes gives different benchmark accuracies on the Pfam-seed random dataset split.

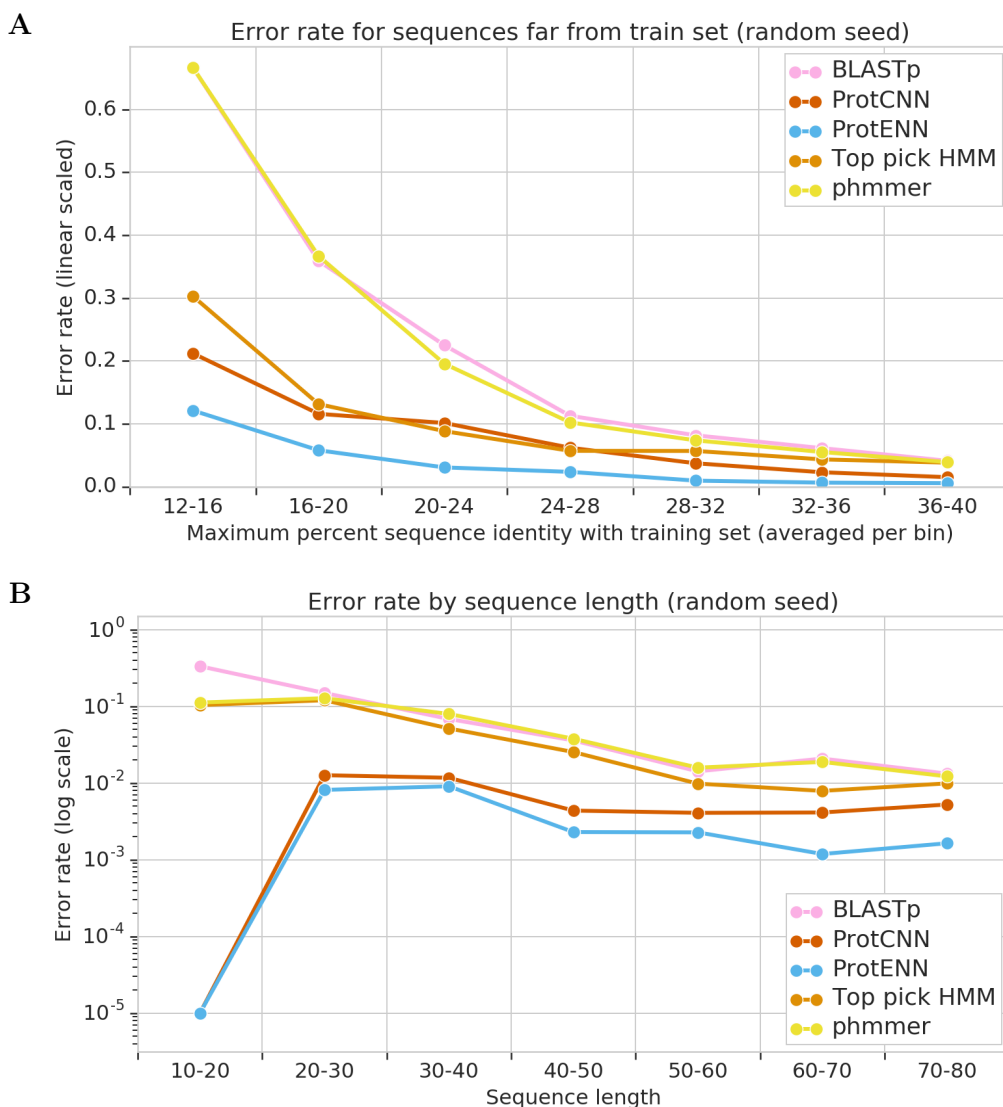

Figure S3: **Model performance on the random split of Pfam-seed.** (A) Zoomed plot of model performance for sequence identities below 40% (13457 sequences) on the randomly split data. Note that ProtENN is significantly better for all bins, including the 12-16% bin (2-sided McNemar test for ProtENN compared to Top Pick HMM, 12-16%: 33 sequences  $p = 0.031250$ , 16-20% 259 sequences  $p = 0.001319$ , 20-24%: 849 sequences  $p < 10e^{-6}$ , 24-28%: 1614 sequences  $p < 10e^{-6}$ , 28-32%: 2499 sequences  $p < 10e^{-6}$ , 32-36%: 3569 sequences  $p < 10e^{-6}$ , 36-40%: 4634 sequences  $p < 10e^{-6}$ ). The number of sequences per bin is available in Table S3. (B) Held-out test error rate as a function of sequence length in the Pfam-seed test set, for sequences less than 80 amino acids long. Differences between baselines and ProtENN are statistically significant in all bins ( 2-sided McNemar test, 10-20 amino acids: 366 sequences  $p < 10e^{-6}$ , 20-30 amino acids: 2215 sequences  $p < 10e^{-6}$ , 30-40 amino acids: 3419 sequences  $p < 10e^{-6}$ , 40-50 amino acids: 4813 sequences  $p < 10e^{-6}$ , 50-60 amino acids: 6625 sequences  $p < 10e^{-6}$ , 60-70 amino acids: 8495 sequences  $p < 10e^{-6}$ , 70-80 amino acids: 8600 sequences  $p < 10e^{-6}$ ).

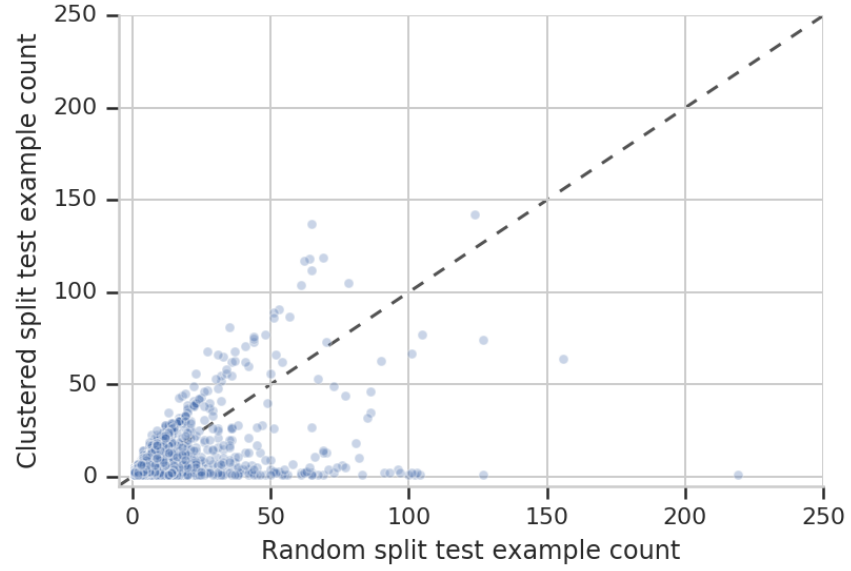

Figure S4: Number of test-set sequences for each family in the random and clustered splits. While the clustering process is desirable because it ensures separation between train and test data, it introduces a distribution over families in the test data that is significantly different than the overall distribution in Pfam.

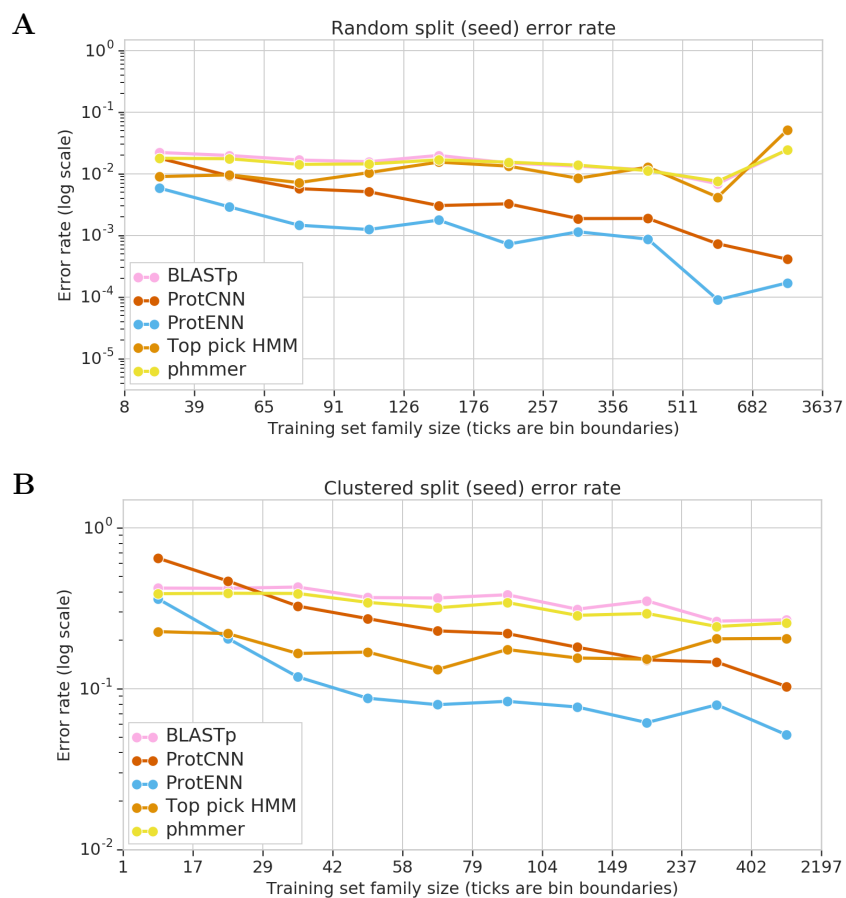

Figure S5: **Model performance stratified by family size. Held-out test error rate as a function of training family size for (A) Random split of Pfam-seed, and (B) Clustered split of Pfam-seed.** In each case, data is binned into deciles of equal numbers of sequences, and the x-label ticks are the upper bound of each decile.

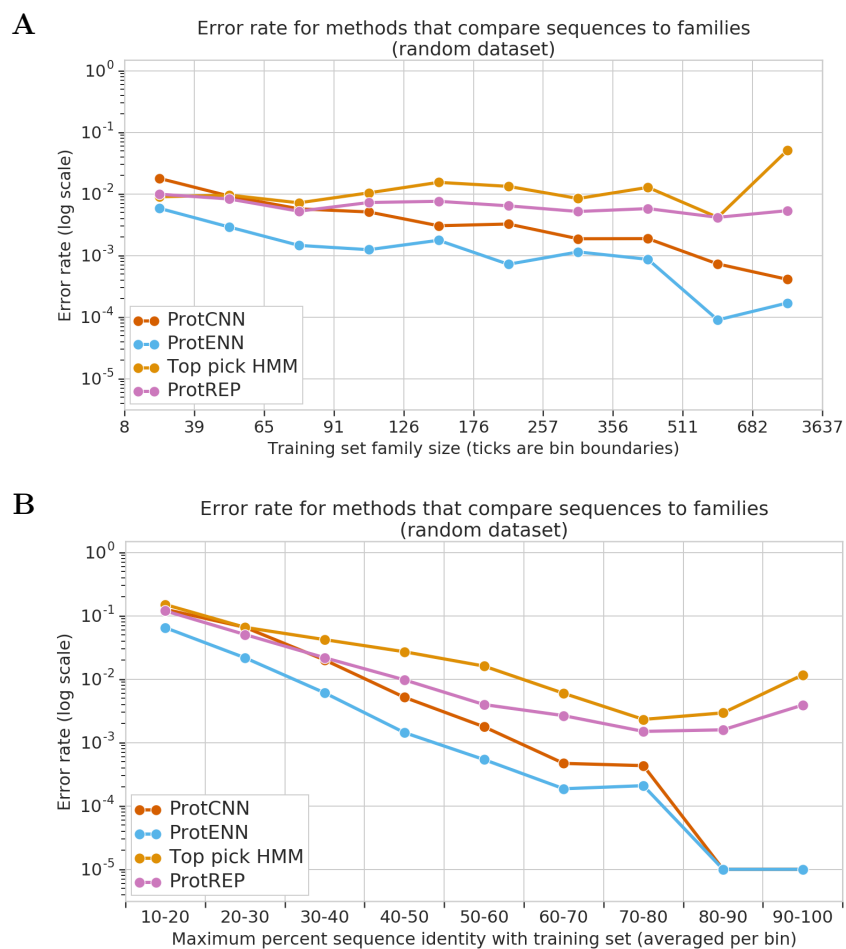

Figure S6: **Performance when classifying using nearest neighbors in embedding space.** (A) Performance vs. family size on the random split. (B) Performance vs. maximum seq identity with the train set on the random split.

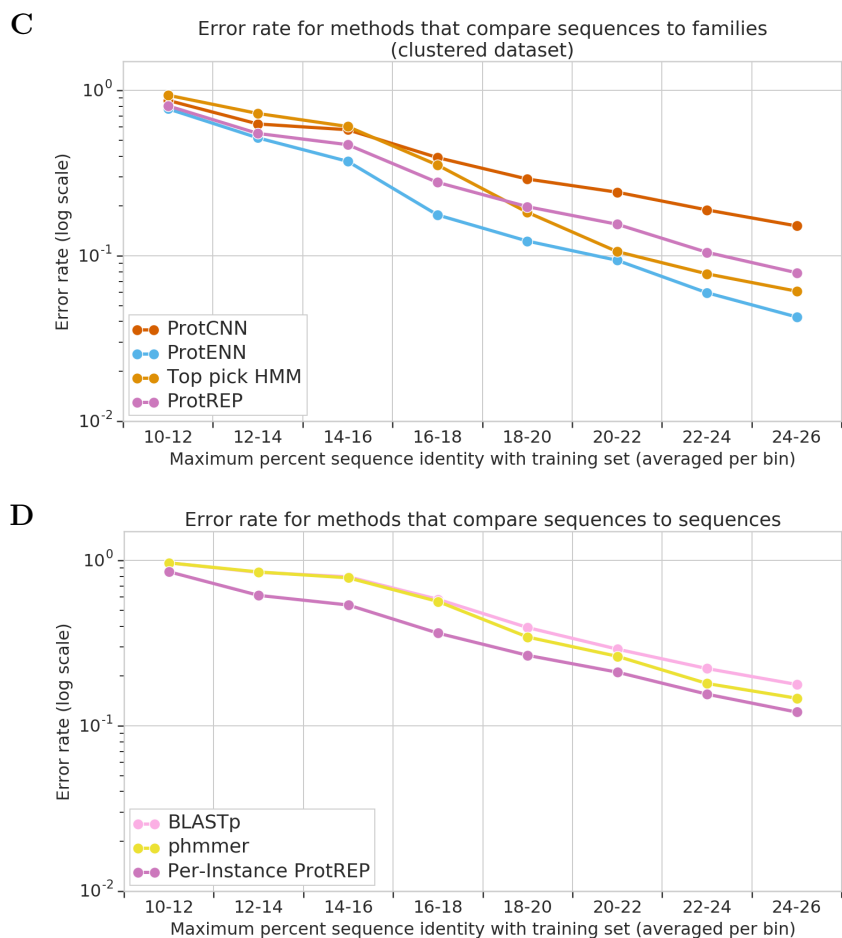

Figure S6: (C) Performance vs. maximum seq identity with the train set on the clustered split. Here, we observe that embedding-based classification can outperform ProtCNN, despite having the same computational efficiency. (D) Model performance on the clustered split of methods that perform pairwise sequence comparisons. Sequence similarity using the neural network embeddings enables remote homolog annotation with significantly better accuracy than the pairwise sequence alignment used by BLASTp and phmmer on all bins > 10 (2-sided McNemar Test, per-instance ProtREP compared to phmmer, 10-12%: 62 sequences  $p = 0.015625$ , 12-14%: 426 sequences  $p < 10e^{-6}$ , 14-16%: 1058 sequences  $p < 10e^{-6}$ , 16-18%: 2516 sequences  $p < 10e^{-6}$ , 18-20%: 4419 sequences  $p < 10e^{-6}$ , 20-22%: 6013 sequences  $p < 10e^{-6}$ , 22-24%: 4892 sequences  $p = 0.000307$ , 24-25%: 1902 sequences  $p = 0.010523$ ). The number of sequences per bin is available in Table S5. compare with Fig. ?? in the main text, which shows the performance of family based methods on this task.



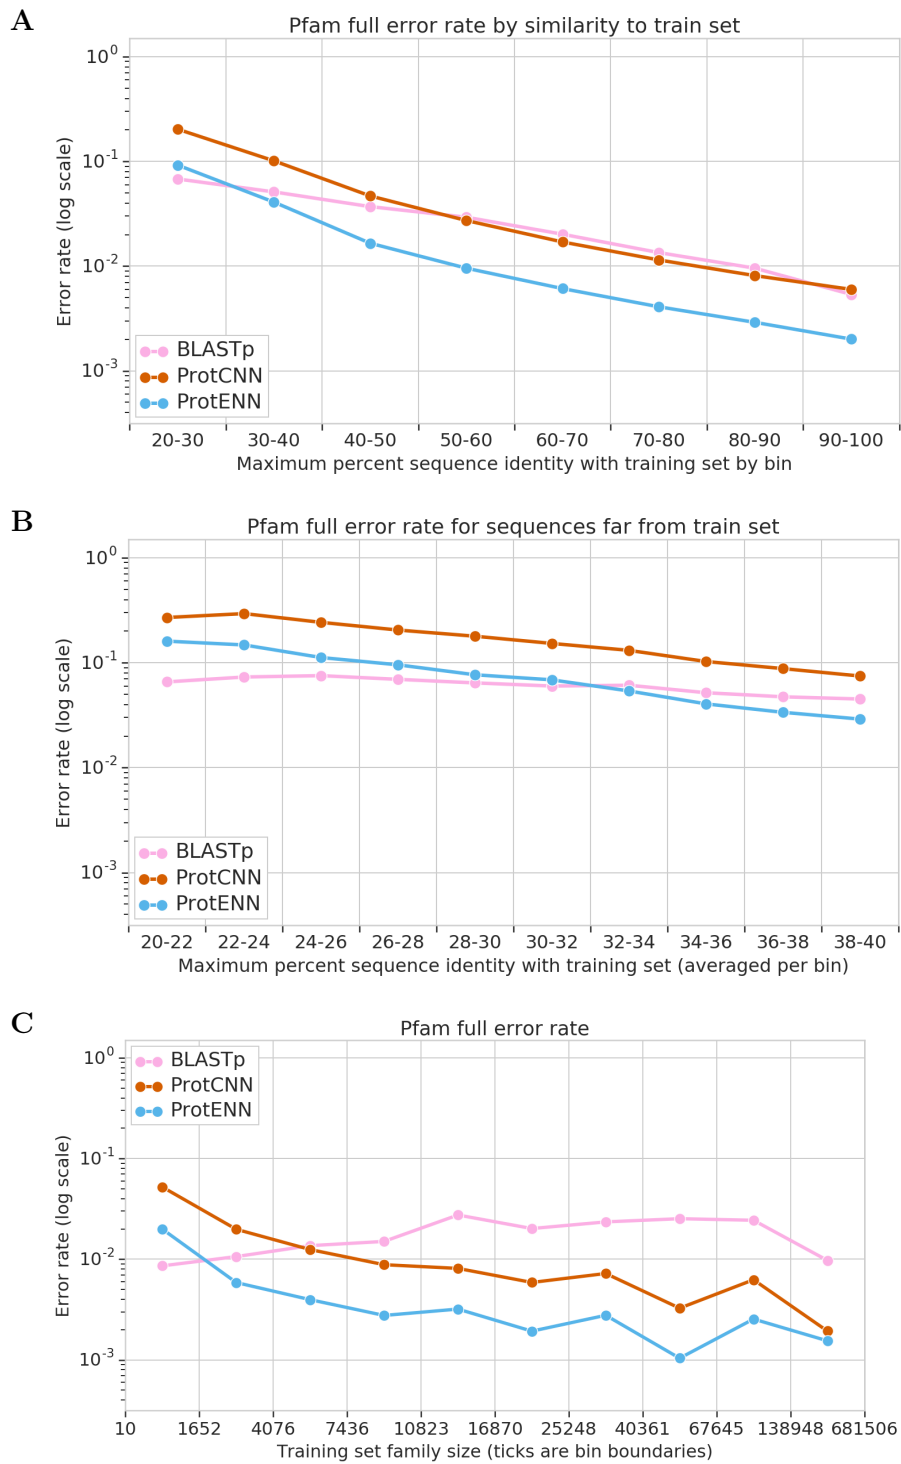

Figure S7: Model performance on the random split of Pfam-full.

Figure S7: **Model performance on the random split of Pfam-full.** (A) Held-out test error rate as a function of the percent sequence identity from sequences in the Pfam-full training set. Data binned by percent sequence identity with the training set; x-labels describe bin ranges. Differences between model performance in all bins are statistically significant (2-sided McNemar Test for ProtENN compared to BLASTp, 20-30%: 12135 sequences  $p < 10e^{-6}$ , 30-40%: 78075 sequences  $p < 10e^{-6}$ , 40-50%: 182431 sequences  $p < 10e^{-6}$ , 50-60%: 331440 sequences  $p < 10e^{-6}$ , 60-70%: 506826 sequences  $p < 10e^{-6}$ , 70-80%: 720693 sequences  $p < 10e^{-6}$ , 80-90%: 1068624 sequences  $p < 10e^{-6}$ , 90-100%: 1656757 sequences  $p < 10e^{-6}$ ). (B) Data for the 90210 sequences with 20-40% sequence identity to the training set, subdivided into 10 bins; all differences are statistically significant (2-sided McNemar test for ProtENN compared to BLASTp, 20-22%: 137 sequences  $p = 0.019157$ , 22-24% 629 sequences  $p = 0.000004$ , 24-26%: 1792 sequences  $p = 0.000031$ , 26-28%: 3600 sequences  $p = 0.000016$ , 28-30%: 5977 sequences  $p = 0.004361$ , 30-32%: 8967 sequences  $p = 0.010569$ , 32-34%: 12090 sequences  $p = 0.008748$ , 34-36%: 15311 sequences  $p = 0.000001$ , 36-38%: 19530 sequences  $p < 10e^{-6}$ , 38-40%: 22177 sequences  $p < 10e^{-6}$ ). The number of sequences per bin are available in Tables S10 and S11. (C) Data is binned into deciles of equal numbers of sequences, and the x-label ticks are the upper bound of each decile. Differences between model performance in all bins are statistically significant (2-sided McNemar Test for ProtENN compared to BLASTp, 10-1652 training sequences: 545094 sequences  $p < 10e^{-6}$ , 1652-4076 training sequences: 544363 sequences  $p < 10e^{-6}$ , 4076-7436 training sequences: 544447 sequences  $p < 10e^{-6}$ , 7436-10823 training sequences: 544838 sequences  $p < 10e^{-6}$ , 10823-16870 training sequences: 545399 sequences  $p < 10e^{-6}$ , 16870-25248 training sequences: 545041 sequences  $p < 10e^{-6}$ , 25248-40361 training sequences: 543537 sequences  $p < 10e^{-6}$ , 40361-67645 training sequences: 546104 sequences  $p < 10e^{-6}$ , 67645-138948 training sequences: 548817 sequences  $p < 10e^{-6}$ , 138948-681506 training sequences: 537667 sequences  $p < 10e^{-6}$ .

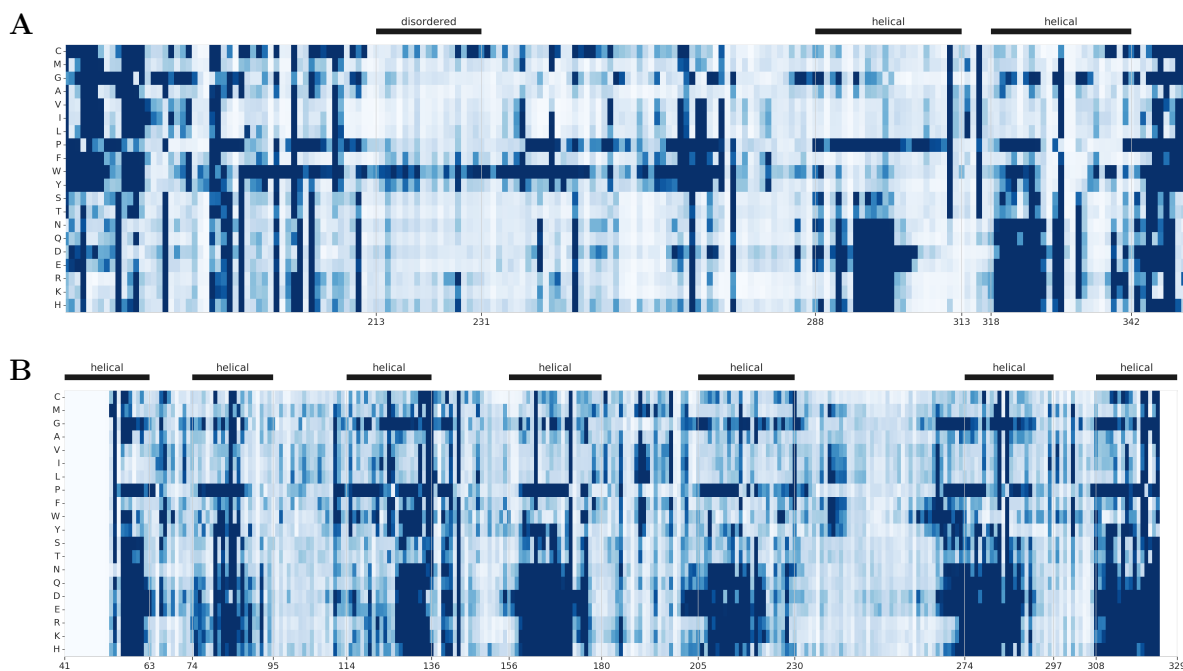

Figure S8: **ProtCNN predicted impact of single amino acid mutations** (A) Predicted change in function for each missense mutation in ATPase domain AT1A1\_PIG/161-352 from family PF00122.20. The ProtCNN model (trained using Pfam-full) appropriately predicts that most substitutions in the disordered region are unlikely to change the protein's function. Substitutions to phenylalanine (P), tyrosine (T) and tryptophan (W) are predicted to have the largest effect on function within the disordered region, in agreement with their known order-promoting properties [20]. (B) Predicted change in function for each missense mutation in vasopressin domain V2R\_HUMAN/54-325 from family PF00001.21. The x-axis is residue indices in the protein P30518 (the domain starts at index 54), the y axis is the substitution of a particular amino acid, and a dark color saturation describes a large predicted change in function.

The model (trained on Pfam-full) appropriately predicts that substituting proline, glycine, or charged amino acids in the transmembrane helix regions is very likely to change the function of the protein substantially. Note that we clip large values to show fine-grained color differentials.

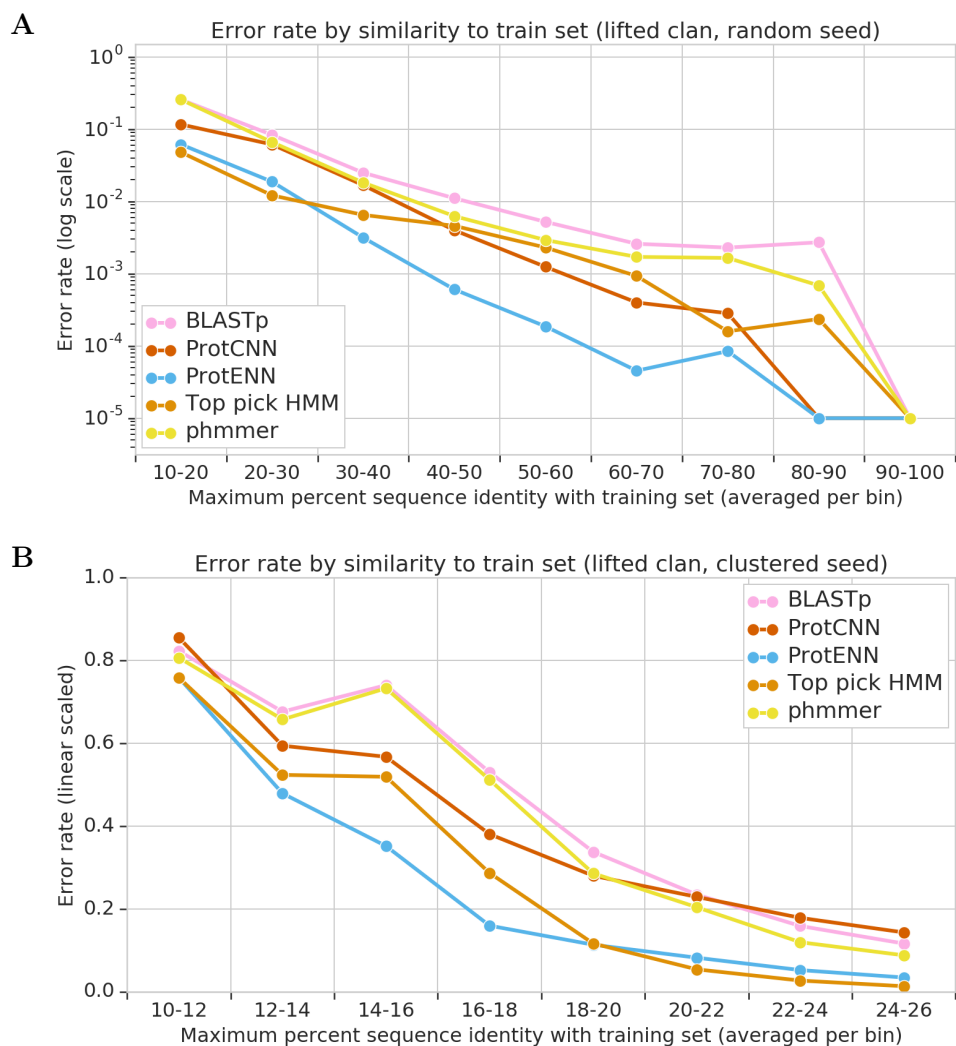

Figure S9: **Pfam Clan level analysis.** To account for evolutionary relationships between families within the same clan, we report the corresponding clan labels for the existing predictions (without retraining any models). If a family is not in a clan, we continue to report the family label. Note that the deep learning models were not retrained, and were not given any information about the existence of Pfam clans. The panels show the held-out test error rate measured at the clan level as a function of the maximum sequence similarity of each held-out test sequence to data in the Pfam-seed training set. (A) Random seed split, data has been binned into 10 bins (note some bins have more sequences than others). (B) Clustered seed split, data has been binned into 8 bins.

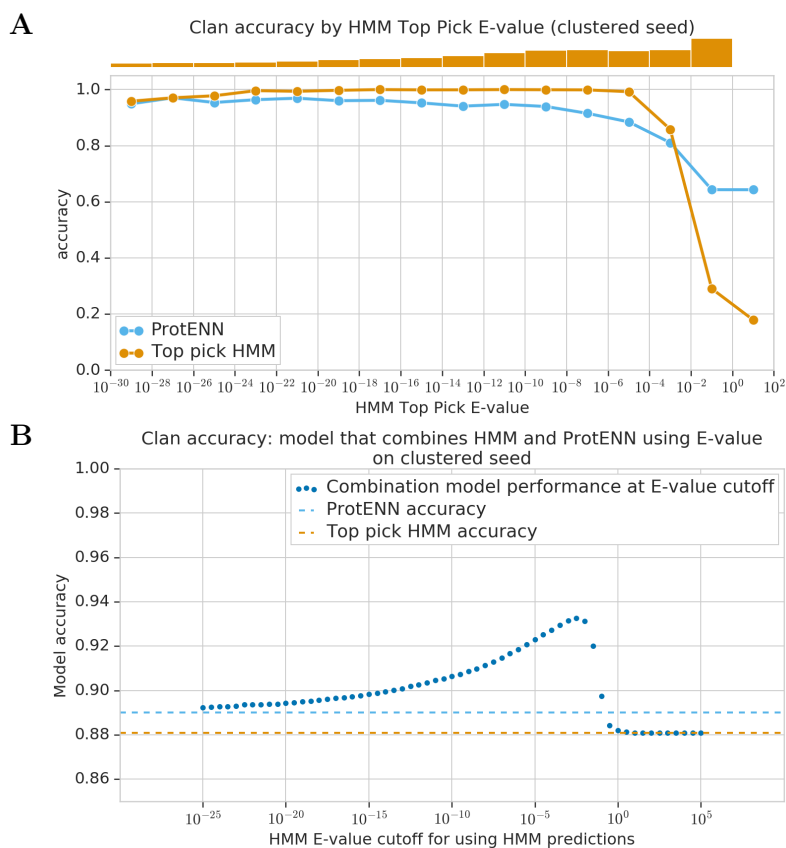

Figure S10: We use Top pick HMM e-value to combine ProtENN and HMMER predictions on the clustered split. (A) Distribution of HMMER confidence scores (e-values) for the clustered held-out test set, alongside the performance of each approach on the clustered seed dataset. At low e-value, Top pick HMM outperforms ProtENN, while at high e-values the inverse is true. (B) Performance of the method that combines HMMER predictions and ProtENN predictions. The combination is controlled by the e-value of the top HMM match for each held-out test sequence. Performance is shown in dark blue dots, as a function of the threshold used to dictate which prediction is taken.

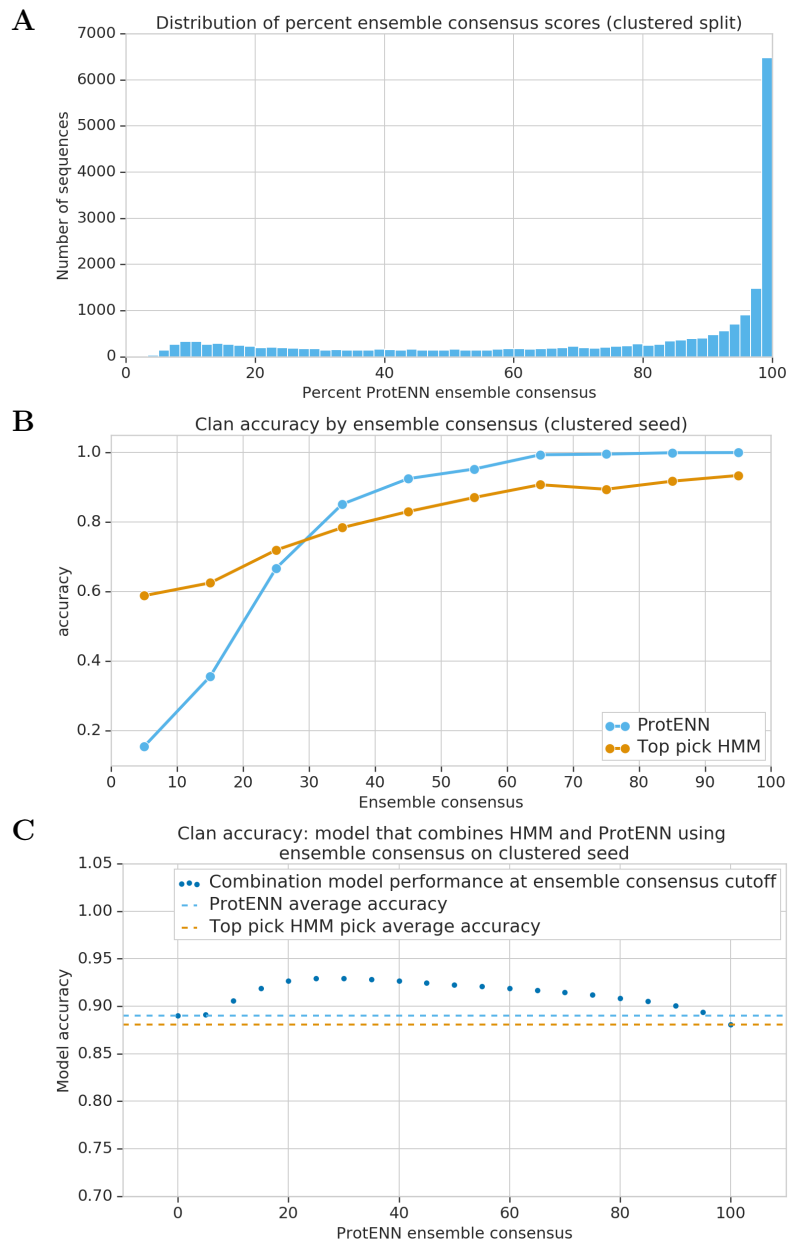

Figure S11: We use ProtENN ensemble consensus to combine ProtENN and HMMER predictions on the clustered split. (A) Distribution of ensemble consensus scores. (B) Performance of each approach on the clustered seed dataset. At low ensemble consensus, HMMER outperforms ProtENN, while at around 60% ensemble consensus the performance of ProtENN starts to plateau. (C) Performance of the method that combines HMMER predictions (when ensemble consensus is low) and ProtENN predictions (when ensemble consensus is high) is shown in dark blue dots, as a function of the ensemble consensus threshold used to dictate which prediction is taken.

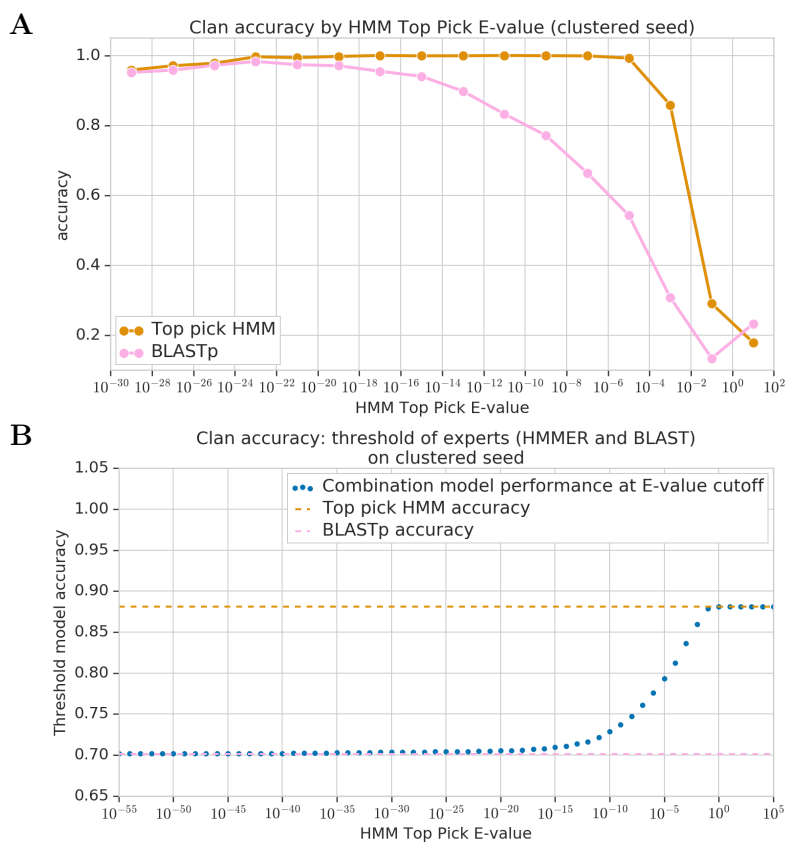

Figure S12: We use the HMMER e-value to combine BLASTp and HMMER predictions on the clustered split. (A) Performance of BLASTp and Top pick HMM on the clustered seed dataset, stratified by the HMMER e-value for each held-out test sequence. (B) Model performance for a combined approach that uses HMM predictions for low HMMER e-values, and BLASTp predictions for high HMMER e-values. We note that combining these two models based on e-value does not create a model that is better than the Top pick HMM model alone.

|       | Number of examples | Number of families |
|-------|--------------------|--------------------|
| Train | 1086741            | 17929              |
| Dev   | 126171             | 13071              |
| Test  | 126171             | 13071              |

Table S1: **Number of examples for the randomly split Pfam-seed data.**

| Sequence Identity Interval | Number of Sequences |
|----------------------------|---------------------|
| 10-20                      | 292                 |
| 20-30                      | 3628                |
| 30-40                      | 9537                |
| 40-50                      | 16798               |
| 50-60                      | 22662               |
| 60-70                      | 28277               |
| 70-80                      | 40221               |
| 80-90                      | 4429                |
| 90-100                     | 256                 |

Table S2: Number of sequences per sequence identity bucket for the random Pfam-seed split.

| Sequence Identity Interval | Number of Sequences |
|----------------------------|---------------------|
| 12-16                      | 33                  |
| 16-20                      | 259                 |
| 20-24                      | 849                 |
| 24-28                      | 1614                |
| 28-32                      | 2499                |
| 32-36                      | 3569                |
| 36-40                      | 4634                |

Table S3: Number of sequences per sequence identity bucket for more remote sequences of random Pfam-seed split in Figure S3A.



|       | Number of examples | Number of families |
|-------|--------------------|--------------------|
| Train | 1296280            | 17929              |
| Dev   | 21510              | 4323               |
| Test  | 21293              | 3097               |

Table S4: **Number of examples for the clustered split of the Pfam-seed data.**

| Sequence Identity Interval | Number of Sequences |
|----------------------------|---------------------|
| 10-12                      | 62                  |
| 12-14                      | 426                 |
| 14-16                      | 1058                |
| 16-18                      | 2516                |
| 18-20                      | 4419                |
| 20-22                      | 6013                |
| 22-24                      | 4892                |
| 24-25                      | 1902                |

Table S5: Number of sequences per sequence identity bucket for clustered Pfam-seed split.

| Model          | Error rate | Number of errors |
|----------------|------------|------------------|
| Top Pick HMM   | 15%        | 3552             |
| phmmer         | 31%        | 6453             |
| BLASTp         | 34%        | 7090             |
| ProtCNN        | 25%        | 5117             |
| <b>ProtENN</b> | <b>10%</b> | <b>2174</b>      |

Table S6: **Alternative approach to calculating performance on the clustered split data.** In both [9] and our work, clustering is used to split the data into train and test sets, however, our construction of a test set is slightly different than that of [9]. We first choose which clusters will be in the test set, and then include all sequences belonging to these clusters in the set. In [9], a single sequence is used for each cluster, since this helps ensure that clusters with many elements do not dominate the accuracy calculation. We instead report the expected value of this randomized procedure by first computing per-cluster average performance and then averaging these to obtain dataset-level performance. In practice, the difference between the evaluation approach in this table and in the main paper is minor because many clusters in our test set are singletons.

| Prediction Method      | Overall Error Rate | Small Family Error Rate | Large Family Error Rate |
|------------------------|--------------------|-------------------------|-------------------------|
| ProtCNN                | 0.495%             | 3.380%                  | 0.479%                  |
| ProtREP (Per-Family)   | 0.653%             | 0.651%                  | 0.986%                  |
| ProtREP (Per-Instance) | 0.510%             | 0.502%                  | 1.972%                  |

Table S7: Performance when classifying using nearest neighbors in embedding space on the random split.

| Prediction Method      | Overall Error Rate | Small Family Error Rate | Large Family Error Rate |
|------------------------|--------------------|-------------------------|-------------------------|
| ProtCNN                | 27.624 %           | 82.126 %                | 25.987%                 |
| ProtREP (Per-Family)   | 18.574 %           | 17.957 %                | 39.130%                 |
| ProtREP (Per-Instance) | 24.560 %           | 23.704 %                | 54.428%                 |

Table S8: Performance when classifying using nearest neighbors in embedding space on the clustered split.

| Prediction Method | # Founder Sequences per Small Family | Overall Error Rate | Small Family Error Rate |
|-------------------|--------------------------------------|--------------------|-------------------------|
| ProtCNN           | 0                                    | 0.427%             | 100.0%                  |
| ProtREP           | 1                                    | 0.790%             | 14.9%                   |
| ProtREP           | 2                                    | 0.764%             | 9.0%                    |
| ProtREP           | all available                        | 0.741%             | 0.7%                    |
| Top Pick HMM      | 1                                    | 1.432%             | 9.3%                    |
| Top Pick HMM      | all available                        | 1.414%             | 1.1%                    |

Table S9: **Random split performance at annotating unseen small families of ProtCNN, TPHMM and ProtREP, which uses the learned representation of sequence space.** Small families are defined as those 5568 families that each have <10 train sequences in the random split. The held-out test set contains 710 sequences from these families (see methods), which are used to compute the error rate. ProtREP accuracy at classifying test sequences from unseen small families improves rapidly as founder sequences are provided.

| Sequence Identity Interval | Number of Sequences |
|----------------------------|---------------------|
| 20-30                      | 12135               |
| 30-40                      | 78075               |
| 40-50                      | 182431              |
| 50-60                      | 331440              |
| 60-70                      | 506826              |
| 70-80                      | 720693              |
| 80-90                      | 1068624             |
| 90-100                     | 1656757             |

Table S10: Number of sequences per sequence identity bucket for random Pfam-full split.

| Sequence Identity Interval | Number of Sequences |
|----------------------------|---------------------|
| 20-22                      | 137                 |
| 22-24                      | 629                 |
| 24-26                      | 1792                |
| 26-28                      | 3600                |
| 28-30                      | 5977                |
| 30-32                      | 8967                |
| 32-34                      | 12090               |
| 34-36                      | 15311               |
| 36-38                      | 19530               |
| 38-40                      | 22177               |

Table S11: Number of sequences per sequence identity bucket for more remote sequences of random Pfam-full split.

| <b>Table S12</b>               |                           |                  |                                                  |                                      |
|--------------------------------|---------------------------|------------------|--------------------------------------------------|--------------------------------------|
| <b>Sequence</b>                | <b>ProtENN_call_range</b> | <b>Accession</b> | <b>Description</b>                               | <b>Comment</b>                       |
| P69905 human hemoglobin        | (6, 106)                  | PF00042.22       | Globin                                           |                                      |
|                                | (6, 107)                  | PF00042.22       | Globin                                           |                                      |
|                                | (7, 105)                  | PF00042.22       | Globin                                           |                                      |
|                                | (7, 106)                  | PF00042.22       | Globin                                           |                                      |
|                                | (7, 107)                  | PF00042.22       | Globin                                           | This is exactly the HMMER call       |
|                                | (7, 108)                  | PF00042.22       | Globin                                           |                                      |
|                                | (7, 109)                  | PF00042.22       | Globin                                           |                                      |
|                                | (7, 110)                  | PF00042.22       | Globin                                           |                                      |
|                                | (7, 111)                  | PF00042.22       | Globin                                           |                                      |
|                                | (7, 112)                  | PF00042.22       | Globin                                           |                                      |
|                                | (7, 113)                  | PF00042.22       | Globin                                           |                                      |
|                                | (8, 106)                  | PF00042.22       | Globin                                           |                                      |
|                                | (8, 107)                  | PF00042.22       | Globin                                           |                                      |
|                                | (8, 108)                  | PF00042.22       | Globin                                           |                                      |
|                                | (8, 109)                  | PF00042.22       | Globin                                           |                                      |
|                                | (8, 110)                  | PF00042.22       | Globin                                           |                                      |
|                                | Q8X7B7 E. Coli TrpCF      | (2, 253)         | PF00218.21                                       | Indole-3-glycerol phosphate synthase |
| (3, 253)                       |                           | PF00218.21       | Indole-3-glycerol phosphate synthase             |                                      |
| (5, 253)                       |                           | PF00218.21       | Indole-3-glycerol phosphate synthase             |                                      |
| (6, 253)                       |                           | PF00218.21       | Indole-3-glycerol phosphate synthase             | This is exactly the HMMER call       |
| (6, 254)                       |                           | PF00218.21       | Indole-3-glycerol phosphate synthase             |                                      |
| (6, 255)                       |                           | PF00218.21       | Indole-3-glycerol phosphate synthase             |                                      |
| (7, 253)                       |                           | PF00218.21       | Indole-3-glycerol phosphate synthase             |                                      |
| (258, 449)                     |                           | PF00697.22       | N-(5'phosphoribosyl)anthranilate (PRA) isomerase | This is exactly the HMMER call       |
| P01308 human insulin           | (28, 108)                 | PF00049.18       | Insulin/IGF/Relaxin family                       |                                      |
|                                | (28, 109)                 | PF00049.18       | Insulin/IGF/Relaxin family                       | This is exactly the HMMER call       |
|                                | (29, 109)                 | PF00049.18       | Insulin/IGF/Relaxin family                       |                                      |
| O00180 human potassium channel | (76, 158)                 | PF07885.16       | Ion channel                                      |                                      |
|                                | (76, 159)                 | PF07885.16       | Ion channel                                      |                                      |
|                                | (77, 157)                 | PF07885.16       | Ion channel                                      |                                      |
|                                | (77, 158)                 | PF07885.16       | Ion channel                                      |                                      |
|                                | (77, 159)                 | PF07885.16       | Ion channel                                      |                                      |
|                                | (78, 156)                 | PF07885.16       | Ion channel                                      |                                      |
|                                | (78, 157)                 | PF07885.16       | Ion channel                                      |                                      |
|                                | (78, 158)                 | PF07885.16       | Ion channel                                      |                                      |
|                                | (78, 159)                 | PF07885.16       | Ion channel                                      |                                      |
|                                | (79, 155)                 | PF07885.16       | Ion channel                                      |                                      |
|                                | (79, 156)                 | PF07885.16       | Ion channel                                      |                                      |
|                                | (79, 157)                 | PF07885.16       | Ion channel                                      |                                      |
|                                | (79, 158)                 | PF07885.16       | Ion channel                                      |                                      |
|                                | (79, 159)                 | PF07885.16       | Ion channel                                      |                                      |
|                                | (80, 156)                 | PF07885.16       | Ion channel                                      |                                      |
|                                | (80, 157)                 | PF07885.16       | Ion channel                                      |                                      |
|                                | (80, 158)                 | PF07885.16       | Ion channel                                      |                                      |
|                                | (80, 159)                 | PF07885.16       | Ion channel                                      |                                      |
|                                | (81, 155)                 | PF07885.16       | Ion channel                                      |                                      |
|                                | (81, 156)                 | PF07885.16       | Ion channel                                      |                                      |
|                                | (81, 157)                 | PF07885.16       | Ion channel                                      |                                      |
|                                | (81, 158)                 | PF07885.16       | Ion channel                                      |                                      |
|                                | (81, 159)                 | PF07885.16       | Ion channel                                      |                                      |
| (82, 155)                      | PF07885.16                | Ion channel      |                                                  |                                      |
| (82, 156)                      | PF07885.16                | Ion channel      |                                                  |                                      |
| (82, 157)                      | PF07885.16                | Ion channel      |                                                  |                                      |

| <b>Table S12</b> |                           |                  |                    |                                |
|------------------|---------------------------|------------------|--------------------|--------------------------------|
| <b>Sequence</b>  | <b>ProtENN_call_range</b> | <b>Accession</b> | <b>Description</b> | <b>Comment</b>                 |
|                  | (82, 158)                 | PF07885.16       | lon channel        | This is exactly the HMMER call |
|                  | (82, 159)                 | PF07885.16       | lon channel        |                                |
|                  | (83, 157)                 | PF07885.16       | lon channel        |                                |
|                  | (83, 158)                 | PF07885.16       | lon channel        |                                |
|                  | (83, 159)                 | PF07885.16       | lon channel        |                                |
|                  | (85, 158)                 | PF07885.16       | lon channel        |                                |
|                  | (87, 157)                 | PF07885.16       | lon channel        |                                |
|                  | (87, 158)                 | PF07885.16       | lon channel        |                                |
|                  | (87, 159)                 | PF07885.16       | lon channel        |                                |
|                  | (88, 157)                 | PF07885.16       | lon channel        |                                |
|                  | (88, 158)                 | PF07885.16       | lon channel        |                                |
|                  | (189, 265)                | PF07885.16       | lon channel        |                                |
|                  | (189, 266)                | PF07885.16       | lon channel        |                                |
|                  | (189, 267)                | PF07885.16       | lon channel        |                                |
|                  | (189, 268)                | PF07885.16       | lon channel        |                                |
|                  | (189, 269)                | PF07885.16       | lon channel        |                                |
|                  | (189, 270)                | PF07885.16       | lon channel        |                                |
|                  | (189, 271)                | PF07885.16       | lon channel        |                                |
|                  | (189, 272)                | PF07885.16       | lon channel        |                                |
|                  | (189, 273)                | PF07885.16       | lon channel        |                                |
|                  | (190, 263)                | PF07885.16       | lon channel        |                                |
|                  | (190, 264)                | PF07885.16       | lon channel        |                                |
|                  | (190, 265)                | PF07885.16       | lon channel        |                                |
|                  | (190, 266)                | PF07885.16       | lon channel        |                                |
|                  | (190, 267)                | PF07885.16       | lon channel        |                                |
|                  | (190, 268)                | PF07885.16       | lon channel        |                                |
|                  | (190, 269)                | PF07885.16       | lon channel        |                                |
|                  | (190, 270)                | PF07885.16       | lon channel        |                                |
|                  | (190, 271)                | PF07885.16       | lon channel        |                                |
|                  | (190, 272)                | PF07885.16       | lon channel        |                                |
|                  | (190, 273)                | PF07885.16       | lon channel        |                                |
|                  | (190, 274)                | PF07885.16       | lon channel        |                                |
|                  | (191, 265)                | PF07885.16       | lon channel        |                                |
|                  | (191, 266)                | PF07885.16       | lon channel        |                                |
|                  | (191, 267)                | PF07885.16       | lon channel        |                                |
|                  | (191, 268)                | PF07885.16       | lon channel        |                                |
|                  | (191, 269)                | PF07885.16       | lon channel        |                                |
|                  | (191, 270)                | PF07885.16       | lon channel        |                                |
|                  | (191, 271)                | PF07885.16       | lon channel        | This is exactly the HMMER call |
|                  | (191, 272)                | PF07885.16       | lon channel        |                                |
|                  | (191, 273)                | PF07885.16       | lon channel        |                                |
|                  | (191, 274)                | PF07885.16       | lon channel        |                                |
|                  | (192, 265)                | PF07885.16       | lon channel        |                                |
|                  | (192, 266)                | PF07885.16       | lon channel        |                                |
|                  | (192, 267)                | PF07885.16       | lon channel        |                                |
|                  | (192, 268)                | PF07885.16       | lon channel        |                                |
|                  | (192, 269)                | PF07885.16       | lon channel        |                                |
|                  | (192, 270)                | PF07885.16       | lon channel        |                                |
|                  | (192, 271)                | PF07885.16       | lon channel        |                                |
|                  | (192, 272)                | PF07885.16       | lon channel        |                                |
|                  | (192, 273)                | PF07885.16       | lon channel        |                                |
|                  | (192, 274)                | PF07885.16       | lon channel        |                                |
|                  | (193, 265)                | PF07885.16       | lon channel        |                                |
|                  | (193, 266)                | PF07885.16       | lon channel        |                                |
|                  | (193, 267)                | PF07885.16       | lon channel        |                                |
|                  | (193, 269)                | PF07885.16       | lon channel        |                                |

| <b>Table S12</b>                  |                           |                  |                          |                                                                                                                                                                                                                                                                                              |
|-----------------------------------|---------------------------|------------------|--------------------------|----------------------------------------------------------------------------------------------------------------------------------------------------------------------------------------------------------------------------------------------------------------------------------------------|
| <b>Sequence</b>                   | <b>ProtENN_call_range</b> | <b>Accession</b> | <b>Description</b>       | <b>Comment</b>                                                                                                                                                                                                                                                                               |
|                                   | (193, 270)                | PF07885.16       | Ion channel              |                                                                                                                                                                                                                                                                                              |
|                                   | (193, 271)                | PF07885.16       | Ion channel              |                                                                                                                                                                                                                                                                                              |
|                                   | (193, 272)                | PF07885.16       | Ion channel              |                                                                                                                                                                                                                                                                                              |
|                                   | (193, 273)                | PF07885.16       | Ion channel              |                                                                                                                                                                                                                                                                                              |
|                                   | (194, 270)                | PF07885.16       | Ion channel              |                                                                                                                                                                                                                                                                                              |
|                                   | (196, 270)                | PF07885.16       | Ion channel              |                                                                                                                                                                                                                                                                                              |
|                                   | (197, 269)                | PF07885.16       | Ion channel              |                                                                                                                                                                                                                                                                                              |
|                                   | (197, 270)                | PF07885.16       | Ion channel              |                                                                                                                                                                                                                                                                                              |
|                                   | (197, 272)                | PF07885.16       | Ion channel              |                                                                                                                                                                                                                                                                                              |
|                                   | (197, 273)                | PF07885.16       | Ion channel              |                                                                                                                                                                                                                                                                                              |
|                                   | (198, 270)                | PF07885.16       | Ion channel              |                                                                                                                                                                                                                                                                                              |
| Q46899 E. Coli CRISPR cascade     | (5, 346)                  | PF09344.10       | CT1975-like protein      |                                                                                                                                                                                                                                                                                              |
|                                   | (5, 347)                  | PF09344.10       | CT1975-like protein      |                                                                                                                                                                                                                                                                                              |
|                                   | (5, 352)                  | PF09344.10       | CT1975-like protein      |                                                                                                                                                                                                                                                                                              |
|                                   | (5, 353)                  | PF09344.10       | CT1975-like protein      |                                                                                                                                                                                                                                                                                              |
|                                   | (5, 354)                  | PF09344.10       | CT1975-like protein      |                                                                                                                                                                                                                                                                                              |
|                                   | (5, 355)                  | PF09344.10       | CT1975-like protein      |                                                                                                                                                                                                                                                                                              |
|                                   | (5, 356)                  | PF09344.10       | CT1975-like protein      |                                                                                                                                                                                                                                                                                              |
|                                   | (5, 357)                  | PF09344.10       | CT1975-like protein      |                                                                                                                                                                                                                                                                                              |
|                                   | (5, 358)                  | PF09344.10       | CT1975-like protein      | This is exactly the HMMER call                                                                                                                                                                                                                                                               |
|                                   | (5, 359)                  | PF09344.10       | CT1975-like protein      |                                                                                                                                                                                                                                                                                              |
|                                   | (5, 360)                  | PF09344.10       | CT1975-like protein      |                                                                                                                                                                                                                                                                                              |
| Q5BJ17 Zebrafish methyltransferas | (18, 241)                 | PF00856.28       | SET domain               | This is exactly the HMMER call. There is a missing call for a zinc finger, but the true call for this domain has length < 50, which is by design excluded from these calls.                                                                                                                  |
| Q8R5M8 Mouse Ig                   | (216, 318)                | PF13205.6        | Bacterial Ig-like domain | This is a false positive, and is a match to E-set, not Ig clan. E-set is an immunoglobulin-like fold, so it's not a particularly terrible false positive. Notably, there are also two false negatives on this protein, because there are a missing Ig call for the ranges 52-146 and 151-233 |
|                                   | (237, 320)                | PF13927.6        | Immunoglobulin domain    |                                                                                                                                                                                                                                                                                              |
|                                   | (239, 320)                | PF13927.6        | Immunoglobulin domain    |                                                                                                                                                                                                                                                                                              |
|                                   | (241, 320)                | PF13927.6        | Immunoglobulin domain    |                                                                                                                                                                                                                                                                                              |
|                                   | (243, 320)                | PF13927.6        | Immunoglobulin domain    |                                                                                                                                                                                                                                                                                              |
|                                   | (244, 320)                | PF13927.6        | Immunoglobulin domain    |                                                                                                                                                                                                                                                                                              |
|                                   | (245, 319)                | PF13927.6        | Immunoglobulin domain    |                                                                                                                                                                                                                                                                                              |
|                                   | (245, 320)                | PF13927.6        | Immunoglobulin domain    | This is exactly a HMMER call                                                                                                                                                                                                                                                                 |
|                                   | (245, 321)                | PF13927.6        | Immunoglobulin domain    |                                                                                                                                                                                                                                                                                              |
|                                   | (246, 320)                | PF13927.6        | Immunoglobulin domain    |                                                                                                                                                                                                                                                                                              |
|                                   | (247, 320)                | PF13927.6        | Immunoglobulin domain    |                                                                                                                                                                                                                                                                                              |
|                                   | (248, 320)                | PF13927.6        | Immunoglobulin domain    |                                                                                                                                                                                                                                                                                              |
|                                   | (249, 320)                | PF13927.6        | Immunoglobulin domain    |                                                                                                                                                                                                                                                                                              |
|                                   | (250, 320)                | PF13927.6        | Immunoglobulin domain    |                                                                                                                                                                                                                                                                                              |
|                                   | (251, 320)                | PF13927.6        | Immunoglobulin domain    |                                                                                                                                                                                                                                                                                              |
|                                   | (252, 320)                | PF13927.6        | Immunoglobulin domain    |                                                                                                                                                                                                                                                                                              |
|                                   | (254, 320)                | PF13927.6        | Immunoglobulin domain    |                                                                                                                                                                                                                                                                                              |
|                                   | (255, 320)                | PF13927.6        | Immunoglobulin domain    |                                                                                                                                                                                                                                                                                              |
|                                   | (256, 320)                | PF13927.6        | Immunoglobulin domain    |                                                                                                                                                                                                                                                                                              |
|                                   | (257, 320)                | PF13927.6        | Immunoglobulin domain    |                                                                                                                                                                                                                                                                                              |

| <b>Table S12</b>           |                           |                  |                                                 |                                                                                                                      |
|----------------------------|---------------------------|------------------|-------------------------------------------------|----------------------------------------------------------------------------------------------------------------------|
| <b>Sequence</b>            | <b>ProtENN_call_range</b> | <b>Accession</b> | <b>Description</b>                              | <b>Comment</b>                                                                                                       |
|                            | (309, 373)                | PF13290.6        | Chitinase/beta-hexosaminidase C-terminal domain | This is a false positive for an E-set, which again is not too bad of a false positive since E-set is an Ig-like fold |
| S5S176 yeast dehydrogenase | (29, 140)                 | PF08240.12       | Alcohol dehydrogenase GroES-like domain         |                                                                                                                      |
|                            | (30, 138)                 | PF08240.12       | Alcohol dehydrogenase GroES-like domain         |                                                                                                                      |
|                            | (30, 139)                 | PF08240.12       | Alcohol dehydrogenase GroES-like domain         |                                                                                                                      |
|                            | (30, 140)                 | PF08240.12       | Alcohol dehydrogenase GroES-like domain         |                                                                                                                      |
|                            | (30, 141)                 | PF08240.12       | Alcohol dehydrogenase GroES-like domain         |                                                                                                                      |
|                            | (30, 142)                 | PF08240.12       | Alcohol dehydrogenase GroES-like domain         |                                                                                                                      |
|                            | (31, 136)                 | PF08240.12       | Alcohol dehydrogenase GroES-like domain         |                                                                                                                      |
|                            | (31, 137)                 | PF08240.12       | Alcohol dehydrogenase GroES-like domain         |                                                                                                                      |
|                            | (31, 138)                 | PF08240.12       | Alcohol dehydrogenase GroES-like domain         |                                                                                                                      |
|                            | (31, 139)                 | PF08240.12       | Alcohol dehydrogenase GroES-like domain         |                                                                                                                      |
|                            | (31, 140)                 | PF08240.12       | Alcohol dehydrogenase GroES-like domain         | This is exactly the HMMER call                                                                                       |
|                            | (31, 141)                 | PF08240.12       | Alcohol dehydrogenase GroES-like domain         |                                                                                                                      |
|                            | (31, 142)                 | PF08240.12       | Alcohol dehydrogenase GroES-like domain         |                                                                                                                      |
|                            | (31, 143)                 | PF08240.12       | Alcohol dehydrogenase GroES-like domain         |                                                                                                                      |
|                            | (31, 144)                 | PF08240.12       | Alcohol dehydrogenase GroES-like domain         |                                                                                                                      |
|                            | (31, 145)                 | PF08240.12       | Alcohol dehydrogenase GroES-like domain         |                                                                                                                      |
|                            | (31, 146)                 | PF08240.12       | Alcohol dehydrogenase GroES-like domain         |                                                                                                                      |
|                            | (32, 136)                 | PF08240.12       | Alcohol dehydrogenase GroES-like domain         |                                                                                                                      |
|                            | (32, 137)                 | PF08240.12       | Alcohol dehydrogenase GroES-like domain         |                                                                                                                      |
|                            | (32, 138)                 | PF08240.12       | Alcohol dehydrogenase GroES-like domain         |                                                                                                                      |
|                            | (32, 139)                 | PF08240.12       | Alcohol dehydrogenase GroES-like domain         |                                                                                                                      |
|                            | (32, 140)                 | PF08240.12       | Alcohol dehydrogenase GroES-like domain         |                                                                                                                      |
|                            | (32, 141)                 | PF08240.12       | Alcohol dehydrogenase GroES-like domain         |                                                                                                                      |
|                            | (32, 142)                 | PF08240.12       | Alcohol dehydrogenase GroES-like domain         |                                                                                                                      |
|                            | (32, 143)                 | PF08240.12       | Alcohol dehydrogenase GroES-like domain         |                                                                                                                      |
|                            | (32, 144)                 | PF08240.12       | Alcohol dehydrogenase GroES-like domain         |                                                                                                                      |
|                            | (32, 145)                 | PF08240.12       | Alcohol dehydrogenase GroES-like domain         |                                                                                                                      |
|                            | (32, 146)                 | PF08240.12       | Alcohol dehydrogenase GroES-like domain         |                                                                                                                      |
|                            | (32, 149)                 | PF08240.12       | Alcohol dehydrogenase GroES-like domain         |                                                                                                                      |
|                            | (33, 138)                 | PF08240.12       | Alcohol dehydrogenase GroES-like domain         |                                                                                                                      |
|                            | (33, 139)                 | PF08240.12       | Alcohol dehydrogenase GroES-like domain         |                                                                                                                      |
|                            | (33, 140)                 | PF08240.12       | Alcohol dehydrogenase GroES-like domain         |                                                                                                                      |
|                            | (33, 141)                 | PF08240.12       | Alcohol dehydrogenase GroES-like domain         |                                                                                                                      |
|                            | (33, 142)                 | PF08240.12       | Alcohol dehydrogenase GroES-like domain         |                                                                                                                      |
|                            | (33, 143)                 | PF08240.12       | Alcohol dehydrogenase GroES-like domain         |                                                                                                                      |
|                            | (33, 144)                 | PF08240.12       | Alcohol dehydrogenase GroES-like domain         |                                                                                                                      |
|                            | (33, 149)                 | PF08240.12       | Alcohol dehydrogenase GroES-like domain         |                                                                                                                      |
|                            | (34, 140)                 | PF08240.12       | Alcohol dehydrogenase GroES-like domain         |                                                                                                                      |
|                            | (34, 141)                 | PF08240.12       | Alcohol dehydrogenase GroES-like domain         |                                                                                                                      |
|                            | (34, 142)                 | PF08240.12       | Alcohol dehydrogenase GroES-like domain         |                                                                                                                      |
|                            | (34, 143)                 | PF08240.12       | Alcohol dehydrogenase GroES-like domain         |                                                                                                                      |
|                            | (181, 311)                | PF00107.26       | Zinc-binding dehydrogenase                      |                                                                                                                      |
|                            | (182, 307)                | PF00107.26       | Zinc-binding dehydrogenase                      |                                                                                                                      |
|                            | (182, 308)                | PF00107.26       | Zinc-binding dehydrogenase                      |                                                                                                                      |
|                            | (182, 309)                | PF00107.26       | Zinc-binding dehydrogenase                      |                                                                                                                      |
|                            | (182, 310)                | PF00107.26       | Zinc-binding dehydrogenase                      |                                                                                                                      |
|                            | (182, 311)                | PF00107.26       | Zinc-binding dehydrogenase                      | This is exactly the HMMER call                                                                                       |
|                            | (182, 312)                | PF00107.26       | Zinc-binding dehydrogenase                      |                                                                                                                      |
|                            | (182, 314)                | PF00107.26       | Zinc-binding dehydrogenase                      |                                                                                                                      |
|                            | (182, 315)                | PF00107.26       | Zinc-binding dehydrogenase                      |                                                                                                                      |
|                            | (183, 311)                | PF00107.26       | Zinc-binding dehydrogenase                      |                                                                                                                      |
| Q50510 frog kinase         | (126, 423)                | PF00454.27       | Phosphatidylinositol 3- and 4-kinase            | This is exactly the HMMER call                                                                                       |

| Table S12           |                    |            |                      |                                                                                                            |
|---------------------|--------------------|------------|----------------------|------------------------------------------------------------------------------------------------------------|
| Sequence            | ProtENN_call_range | Accession  | Description          | Comment                                                                                                    |
| Q17766 nematode MFS | (28, 89)           | PF04117.12 | Mpv17 / PMP22 family | This call is a false positive. There is also a false negative (missing call) to Folate Carrier from 1-403. |

521

Table S12: **ProtENN predicted domain boundaries sequence closely match HMMER output for a diverse set of 10 proteins.** Predicted domain boundaries are computed by sliding the ProtENN classifier over all **start – end** ranges, to identify the set of ranges where the confidence is highest (equal to 1). We find that confident ranges very closely match the domain boundaries computed by HMMER for most proteins. We only include predicted domains longer than 50 residues for ProtENN calls, because shorter ranges lead to spurious calls, as is seen often with HMMER, especially with regions that include repeats [21].

522

| Model Type    | Hyperparameter                      | Search Range                     |
|---------------|-------------------------------------|----------------------------------|
| ProtCNN       | batch size                          | 32, 64, 128, 256                 |
|               | dilation rate                       | 1, 2, 3, 5                       |
|               | filters                             | 300 thru 3000, increments of 100 |
|               | ResNet block of first dilated layer | 2, 3                             |
|               | kernel size                         | 3, 7, 9, 11, 21, 31              |
|               | ResNet layers                       | 1 thru 6                         |
|               | learning rate                       | 1e-05, 5e-05, 1e-4, 5e-4, 1e-3   |
|               | learning rate decay steps           | 1e3,1e4,1e6, decay off           |
|               | pooling                             | max, mean                        |
|               | kmer                                | embedding rank                   |
| learning rate |                                     | 1e-4, 5e-4, 1e-3                 |
| ngram order   |                                     | 1 thru 5                         |

Table S13: Search ranges for hyperparameter values for ProtCNN.



| Parameter                  | Value    |
|----------------------------|----------|
| batch size                 | 32       |
| dilation rate              | 3*       |
| filters                    | 1100*    |
| first dilated layer        | 2*       |
| gradient clip              | 1        |
| kernel size                | 9*       |
| learning rate              | .0001*   |
| learning rate decay rate   | 0.997    |
| learning rate decay steps  | 1000*    |
| learning rate warmup steps | 3000     |
| number of ResNet layers    | 5*       |
| pooling                    | max*     |
| ResNet bottleneck factor   | 0.5      |
| train steps                | 500000** |

Table S14: Hyperparameters used in ProtCNN with the Pfam-seed dataset. An asterisk denotes a tuned value. Two asterisks denote that the model was overfit, and the number of tuning steps was chosen post-hoc so as to maximize dev-set performance.

| Model Type       | Search Algorithm | Approx. number of samples |
|------------------|------------------|---------------------------|
| CNN (all depths) | random sampling  | 17000 *                   |
| kmer             | random sampling  | 50                        |

Table S15: Search algorithms and number of samples for hyperparameter tuning, by model. The asterisk denotes that many of these configurations were not feasible, as they did not fit in GPU memory.

| Parameter                  | Value     |
|----------------------------|-----------|
| batch size                 | 64        |
| filters                    | 2000*     |
| first dilated layer        | NA        |
| gradient clip              | 1         |
| kernel size                | 21*       |
| learning rate              | .001*     |
| learning rate decay rate   | 0.997     |
| learning rate decay steps  | 1000*     |
| learning rate warmup steps | 3000      |
| pooling                    | max*      |
| ResNet bottleneck factor   | 0.5       |
| train steps                | 1100000** |

Table S16: Hyperparameters used in ProtCNN with the Pfam-full dataset. An asterisk denotes a tuned value. Two asterisks denote that the model didn't necessarily converge, but was ended after a reasonable time training (17 days).

| Program            | Average inference speed<br>(sequences per core-second) | Estimated runtime on<br>Pfam-seed test (hrs) |
|--------------------|--------------------------------------------------------|----------------------------------------------|
| hmmsearch          | 24.4                                                   | 1.4                                          |
| hmmsearch          | 2.2                                                    | 16.2                                         |
| BLASTp             | 1.1                                                    | 30.5                                         |
| ProtCNN (CPU only) | 9.7                                                    | 3.6                                          |
| ProtCNN (GPU)      | 376.6                                                  | 0.1                                          |

Table S17: Inference speed of `hmmsearch`, `hmmsearch`, and `blastp` run on sandboxed `n1-standard-32` (32-core, 120 GB RAM) Google Cloud Platform instances with all data in main memory and using a single core. The ProtCNN model was run in a similar configuration on a `n1-standard-8` instance (8-core, 32 Gb RAM) using a single CPU thread for ProtCNN (CPU only), and additionally, one NVIDIA P100 GPU accelerator for ProtCNN (GPU). Additional details, including commands used, are available in the supplement.

|                            |        |
|----------------------------|--------|
|                            | kmer   |
| batch size                 | 64     |
| gradient clip              | 1      |
| learning rate              | .0005* |
| learning rate decay rate   | 0.997  |
| learning rate decay step   | 1000   |
| learning rate warmup steps | 3000   |
| kmer order                 | 2*     |
| number of hash buckets     | 10000* |
| train steps                | 300000 |

Table S18: Hyperparameters used in kmer benchmark models. An asterisk denotes a tuned value.

| Sequence Name | Residues | Sequence                                                                                                                                                                                                                                                                                                            |
|---------------|----------|---------------------------------------------------------------------------------------------------------------------------------------------------------------------------------------------------------------------------------------------------------------------------------------------------------------------|
| AT1A1_PIG     | 161-352  | NMVPQQALVIRNGEKMSINAEVVVG<br>DLVEVKGGDRIPADLRIISANGCKVD<br>NSSLTGESEPPQTRSPDFTNENPLETR<br>NIAFFSTNCVEGTARGIVVYTGDRTV<br>MGRIATLASGLEGGQTPIAAEIEHFI<br>HIITGVAVFLGVSFFILSLILEYTWL<br>EAVIFLIGIIVANVPEGLLATVTVCL<br>TLTAKRMARK                                                                                        |
| V2R_HUMAN     | 54-325   | SNGLVLAALARRGRRGHWAPIHVFIG<br>HLCLADLAVALFQVLPQLAWKATDRF<br>RGPDALCRAVKYLQVMGYASSYMIL<br>AMTLDRHRAICRPMLAYRHGSAHWN<br>RPVLVAVAFSLLSLPQLFIFAQRNV<br>EGGSGVTDCWACFAEPWGRRTYVTWI<br>ALMVFVAPTLGIAACQVLIFREIHAS<br>LVPGPSERPGRRRGRRTGSPGEGAH<br>VSAAVAKTVRMTLVIVVVVLCWAPF<br>FLVQLWAAWDPEAPLEGAPFVLLMLL<br>ASLNSCTNPWIY |

Table S19: Wildtype sequences, keyed by Uniprot ID, that were used for saturation mutagenesis predictions.
